1 **Transcriptomic profiling uncovers novel players in innate immunity in *Arabidopsis***  
2 *thaliana*

3

4 Mehdi Safaeizadeh <sup>a,b,\*</sup>, Thomas Boller <sup>b</sup>, Claude Becker <sup>c,d</sup>

5 <sup>a</sup>Department of Plant Biotechnology, Faculty of Life Sciences and Biotechnology, Shahid  
6 Beheshti University, Tehran, Iran; <sup>b</sup>Zürich-Basel Plant Science Center, Department of  
7 Environmental Sciences, University of Basel, 4056 Basel, Switzerland; <sup>c</sup>Genetics, LMU  
8 Biocentre, Faculty of Biology, Ludwig-Maximilian-University Munich, 82152 Martinsried,  
9 Germany; <sup>d</sup>Gregor Mendel Institute of Molecular Plant Biology, Austrian Academy of  
10 Sciences, Vienna BioCenter (VBC), 1030 Vienna, Austria

11

12 Author contact information:

13 \* To whom correspondence should be addressed: Mehdi Safaeizadeh

14 Author contact information:

15 First author:

16 Assistant Prof. Dr. Mehdi Safaeizadeh

17 **E-mail:**

18 [Ma\\_Safaei@sbu.ac.ir](mailto:Ma_Safaei@sbu.ac.ir)

19 [Mehdi.Safaeizadeh@gmail.com](mailto:Mehdi.Safaeizadeh@gmail.com)

20 [Mehdi.Safaeizadeh@unibas.ch](mailto:Mehdi.Safaeizadeh@unibas.ch)

21 Contact number: Tel: +41(0)76 / 617-0006; +98(0)91 / 2037-3610; +98(0)21 / 2243-1964

22

23 Second author:

24 Prof. em. Dr. Thomas Boller

25 **Email:** [Thomas.Boller@unibas.ch](mailto:Thomas.Boller@unibas.ch)

26 Contact number: Tel: + 41 61 403 04 24

27

28 Third author:

29 Prof. Dr. Claude Becker

30 **Email:** [claude.becker@gmi.oeaw.ac.at](mailto:claude.becker@gmi.oeaw.ac.at)

31

32 Contact number: +43 1 79044 9870

33

34 **Reference numbers:** The raw sequencing reads have been deposited in the EBI Annotate  
35 repository (<https://www.ebi.ac.uk/fg/annotate/>) under the accession number E-MTAB-9838.

### 36 **Abbreviations**

37 DAMPs: Damage-associated molecular patterns; DEGs: differentially expressed genes;  
38 MAMPs: microbe-associated molecular patterns; NGS: next generation sequencing; PRR:  
39 pattern-recognition receptor; PEPR: AtPep-receptor; PP2: phloem protein 2; PTI: pattern-  
40 triggered immunity

### 41 **Abstract**

42 In this research a high-throughput RNA sequencing based transcriptome analysis technique  
43 (RNA-Seq) was used to evaluate differentially expressed genes (DEGs) in the wild type  
44 Arabidopsis seedling in response to flg22, a well-known microbe-associated molecular pattern  
45 (MAMP), and AtPep1, a well-known peptide representing an endogenous damage-associated  
46 molecular patterns (DAMP). The results of our study revealed that 1895 (1634 up-regulated  
47 and 261 down-regulated) and 2271 (1706 up-regulated and 565 down-regulated) significant  
48 differentially expressed genes in response to flg22 and AtPep1 treatment, respectively. Among  
49 significant DEGs, we observed that a number of hitherto overlooked genes have been found to  
50 be induced upon treatment with either flg22 or with AtPep1, indicating their possible  
51 involvement in innate immunity. Here, we characterized two of them, namely PP2-B13 and  
52 ACLP1. *pp2-b13* and *aclp1* mutants showed an increased susceptibility to infection by the  
53 virulent pathogen *Pseudomonas syringae pv tomato mutant hrcC-*, as evidenced by an  
54 increased growth of the pathogen in planta. Further we present evidence that the *aclp1* mutant  
55 was deficient in ethylene production upon flg22 treatment, while the *pp2-b13* mutant, was  
56 deficient in ROS production. The results from this research provide new information to a  
57 better understanding of the immune system in Arabidopsis.

58 **Keywords:** *Arabidopsis thaliana*, AtPep1, FLS2 receptor, defense genes, gene expression,  
59 immune signaling, next generation sequencing, pattern recognition receptor, pattern-triggered  
60 immunity, plant immunology, RNAseq, transcriptome

## 61 **Introduction**

62 As sessile organisms, plants are constantly under attack by a broad range of different  
63 microbes<sup>1-7</sup>. In a co-evolutionary arms race between plants and pathogens, plants initially  
64 sense the presence of microbes by perceiving microbe-associated molecular patterns  
65 (MAMPs) via membrane-resident pattern recognition receptors (PRRs) that are located on the  
66 cell surface; such MAMP perception generally leads to pattern-triggered immunity (PTI)  
67 <sup>1,4,8,10</sup>.

68 The model plant *Arabidopsis thaliana* can detect a variety of MAMPs, including fungal chitin  
69 and bacterial elicitors such as flagellin and elongation factor-Tu (EF-Tu), or their respective  
70 peptide surrogates flg22 and elf18<sup>8-10</sup>. Flagellin and EF-Tu are perceived by FLS2 and EFR  
71 receptors, respectively. Besides MAMPs, molecular patterns derived from the plant upon  
72 pathogen attack can also trigger an immunity response. Examples of such damage-associated  
73 molecular patterns (DAMPs) are members of the family of AtPeps, recently discovered  
74 endogenous and highly conserved peptides in *A. thaliana*. The different AtPeps (AtPep1-8)  
75 originate from the conserved C-terminal portion of their respective precursors AtPROPEP1-8  
76 <sup>11-14</sup>. The plant cell surface PRRs AtPEPR1 and AtPEPR2 have been identified as the AtPeps  
77 receptors<sup>12,16,17</sup>.

78 DAMP/MAMP perception triggers a vast array of defense responses<sup>1,12</sup>. These include the  
79 production of reactive oxygen species (ROS) in an oxidative burst<sup>18,19</sup>, the multi-level specific  
80 reprogramming of expression profiles at transcriptional and also post-transcriptional levels<sup>20-</sup>  
81 <sup>23</sup>, and downstream defense responses, including callose deposition<sup>24</sup>, MAP kinase activation,  
82 synthesis of the defense hormone salicylic acid (SA), and seedling growth inhibition<sup>25</sup>.  
83 MAMP treatment prior to the actual pathogen attack results in enhanced resistance to adapted  
84 pathogens, and it has been observed that mutants impaired in MAMP recognition display  
85 enhanced susceptibility, not only to adapted but also to non-adapted pathogens<sup>10,19,23,26</sup>. This  
86 indicates a contribution of pattern-triggered immunity (PTI) to both basal and non-host  
87 resistance, highlighting the importance of PTI in plant innate immunity<sup>27-30</sup>.

88 The proteobacterium *Pseudomonas syringae* is a bacterial leaf pathogen that causes  
89 destructive chlorosis and necrotic spots in different plant species, including monocots and  
90 dicots. *P. syringae* pathovars and races differ in host range among crop species and cultivars,  
91 respectively<sup>6,31</sup>. Many strains of *P. syringae* are pathogenic in the model plant *A. thaliana*,  
92 which makes *P. syringae* an ideal model to investigate plant-pathogen interactions<sup>31-33</sup>. The

93 ability of *P. syringae* to grow in plants and to multiply endophytically depends on the type-  
94 three secretion system (T3SS). T3SS enables the secretion into the cytoplasm of the plant cell  
95 of effector proteins, which suppress or, in some cases, change plant defense responses<sup>34</sup>. *P.*  
96 *syringae* encodes 57 families of different effectors injected into the plant cell by the T3SS<sup>32</sup>.  
97 Effectors inside plant cells are recognized by R proteins, which constitute the second level of  
98 defense known as effector-triggered immunity (ETI)<sup>1,20,35</sup>.

99 PTI response is controlled by a complex, interconnected signaling network, including many  
100 transcription factors (TFs); interference with this network can paralyze the adequate response  
101 upon pathogen infection<sup>36,37</sup>. A large fraction of genes in the plant genome respond  
102 transcriptionally to pathogen attack<sup>21,38</sup>. In addition to specific reprogramming of  
103 transcription, post-transcriptional regulation also plays a role in the plant immune response<sup>39</sup>.  
104 The advent of advanced sequencing and proteomics technologies has led to the identification  
105 of many novel players in defense signaling pathways and their characterization as important  
106 components of innate immunity in *Arabidopsis*. However, for a fundamental understanding of  
107 the plant's defense system and its response to pathogens, it is necessary to fill the remaining  
108 gaps by further identifying genes and proteins involved in plant immunity<sup>1</sup>.

109 The highly conserved 22-amino-acid fragment (flg22) of bacterial flagellin that is recognized  
110 by the FLS2 PRR can activate an array of immune responses in *Arabidopsis*<sup>1-4</sup>. In addition,  
111 resistance to *Pst* DC3000 is induced by pre-treatment with flg22<sup>1-4,9,23</sup>. Previous studies  
112 investigating flg22-induced transcriptional changes showed that among highly induced genes,  
113 there were several with functions in the *Arabidopsis* immune pathway that had previously not  
114 been associated with immunity<sup>23,40,41</sup>. These studies profiled only a part of the *Arabidopsis*  
115 gene space, and one can therefore speculate that a whole-genome transcriptome profiling of  
116 elicitor-treated *Arabidopsis* plants would unveil additional new players in the immune  
117 signaling system. Furthermore, given that both the MAMP flg22 and the DAMPs AtPeps  
118 trigger immunity, analyzing their respective effects side by side in one coherently designed  
119 experiment could increase the power to detect shared features and specific responses of the  
120 respective immune response pathways.

121 Here, we performed whole-genome transcriptome profiling by RNA sequencing (RNA-seq)<sup>42-</sup>  
122 <sup>45</sup> of *Arabidopsis* seedlings treated with either flg22 or AtPep1 treatments. Filtering for genes  
123 induced in both treatments and those missing in previously published assays, we selected 85  
124 candidate genes to be investigated for their role in plant immune response and systematically  
125 tested T-DNA insertion mutants of these genes for susceptibility towards *Pst*. For two loci,

126 *PHLOEM PROTEIN 2-B13* (*PP2-B13*) and *ACTIN CROSS-LINKING PROTEIN 1* (*ACLPI*),  
127 we identified mutant lines with altered pathogen response phenotypes and characterized these  
128 genes as novel players in early PTI responses.

## 129 **Results**

### 130 **Whole-genome transcriptional profiling identifies two novel factors of PTI**

131 To dissect transcriptional responses in response to flg22 and AtPep1, we extracted total RNA  
132 from mock- and elicitor-treated one-week-old Arabidopsis plants and performed RNA-seq  
133 transcriptome analysis on three biological replicates per treatment (Supplementary File S1 and  
134 S2). Samples were collected 30 min after elicitor treatment. We used the R package DESeq2<sup>46</sup>  
135 for differential gene expression analysis; all differentially expressed genes (DEGs) can be  
136 found in Supplementary Files S3-S6. In response to flg22, we detected a total of 1,895 DEGs  
137 compared to the control treatment (Fig. 1A), of which 1,634 genes were up- and 261 were  
138 down-regulated in the flg22-treated seedlings (Supplementary Files S3 and S5). Treatment  
139 with AtPep1 resulted in 2,271 DEGs, with 1,706 up-regulated and 565 down-regulated (Fig.  
140 1A). When comparing the two treatments with each other, we detected only 511 DEGs, with  
141 similar fractions of up- and down-regulated genes (265 and 246, respectively, in flg22 vs.  
142 AtPep1) (Fig. 1A). Taken together, these results indicated that AtPep1 treatment causes  
143 slightly more genes to be differentially regulated than flg22, and that the transcriptional  
144 profiles are more similar between flg22- and AtPep1-treated samples than between either of  
145 the treatments and the control. While a remarkable 70% of flg22-up-regulated genes were also  
146 induced by AtPep1, 256 genes were exclusively up-regulated in response to flg22, while 328  
147 were exclusively up-regulated in response to AtPep1 (Fig. 1; panel B). Of genes down-  
148 regulated upon flg22 treatment, only 23% were also down-regulated in response to AtPep1;  
149 107 genes were exclusively down-regulated by flg22 treatment, vs. 411 genes by AtPep1 (Fig.  
150 1; panel C). Detailed information on DEGs from different comparisons are presented in  
151 Supplementary Files S1 to S16.

152 In response to flg22, the expression levels of *PP2-B13* and of *ACLPI* were 126-fold and 20-  
153 fold induced, respectively (Fig. 1D). Similarly, AtPep1 treatment leads to 120-fold up-  
154 regulation of *PP2-B13* and a 10-fold up-regulation of *ACLPI* (Fig. 1E).

155 Former studies showed that treatment of Arabidopsis seedlings with flg22 triggers robust PTI-  
156 like responses at the transcriptional level, activating ca. 1,000 genes that may have functions  
157 in PTI responses<sup>23,40,41</sup>. However, because these experiments were done using the ATH1  
158 microarray, which does not cover all Arabidopsis protein-coding genes, we speculated that

159 there might be additional, so far unknown PTI-related genes affected by flg22 and other  
160 elicitors. Denoux et al., (2008)<sup>41</sup> performed a comprehensive microarray (Affymetrix ATH1)  
161 transcript analysis in response to flg22 treatment. However, our RNA-seq analysis revealed  
162 3,297 genes induced (without fold-change cutoff) in response to flg22 treatment that had not  
163 been present on the ATH1 chip (Supplementary File S7). Comparing the upregulated DEGs  
164 results in RNA-seq experiment analysis with fold change cutoff (adjusted  $p$ -value < 0.05 and  
165 a minimum two-fold change) among the genes which are also present in ATH1 affymetrix  
166 genechip showed that 1366 upregulated DEGs are present in both RNA-seq experiment and  
167 ATH1 affymetrix genechip (Supplementary File S8). While our analysis showed that 268  
168 genes with fold change cutoff are exclusively upregulated in RNA-seq analysis which were  
169 not present in ATH1 affymetrix genechip and their expression only investigated in RNA-seq  
170 analysis (Supplementary File S9). To identify yet unknown PTI factors, we first discarded all  
171 genes from our list of DEGs that had been present on the ATH1 microarray chip and hence  
172 would have been detected in the above-mentioned studies.

173 We then ranked the remaining DEGs by fold change induction (high induction of transcription  
174 in response to both flg22 and AtPep1 treatments) and selected the 85 most strongly up-  
175 regulated genes as candidates (Supplementary File S10). Finally, we decided to focus on a  
176 small set of genes that showed highest induction after flg22 treatment (Table 1). We checked  
177 for availability of T-DNA insertion mutants for these genes and retrieved mutant lines for  
178 AT1G56240, AT1G65385, AT4G23215, AT1G59865, AT1G24145, AT2G35658,  
179 AT1G69900, AT2G27389, and AT1G30755. We confirmed homozygous T-DNA insertions  
180 via PCR.

181 To test whether any of the candidate genes might play a role in immunity, we tested all  
182 homozygous T-DNA mutant lines for bacterial growth of the mutant pathogenic strain *P.*  
183 *syringae* pv. *tomato hrcC-* (*Pst hrcC-*), which is defective in T3SS. Comparing the bacterial  
184 growth titer in the mutant plants to that of wild-type Col-0 revealed that two of the lines,  
185 namely SALK\_144757.54.50 and SALK\_68692.47.55, showed significantly better bacterial  
186 growth ( $P$ -value = 0.0261 and 0.0089, respectively; Student's  $T$ -test) (Fig. 4), and that the  
187 underlying loci might play a role in defense signaling.

### 188 **Expression of the *PP2-B13* and *ACLPI* genes is induced following flg22 treatment**

189 According to the Arabidopsis Information Resource<sup>47</sup> and the SIGnAL database  
190 (<http://signal.salk.edu/>), the predicted T-DNA insertion site in SALK\_144757.54.50 is located  
191 in the second of three exons of *PP2-B13*<sup>48</sup> (Fig. 3A); the T-DNA insertion in  
192 SALK\_68692.47.55 is located in the first of two exons of *ACLPI*. We confirmed that the T-

193 DNA insertion lines were null alleles for *pp2-b13* and *aclp1*, respectively, via reverse-  
194 transcription polymerase chain reaction (RT-PCR) (Fig. 3B). *PP2-B13* and *ACLPI* transcripts  
195 were not detectable in the respective T-DNA insertion lines; we therefore refer to these lines  
196 as *pp2-b13* and *aclp1*, respectively. Visual inspection of plant growth did not reveal any  
197 obvious phenotypic differences between any of the two insertion lines and wild-type Col-0  
198 with regard to size and shape at the rosette stage. Two days post infection with *Pst hrcC-*,  
199 neither *pp2-b13* nor *aclp1* showed symptoms different to this of with wild-type Arabidopsis  
200 (Supplementary Fig. S4).

201 As can be seen in the volcano plot in Figure 1D, gene expression levels of *PP2-B13* and  
202 *ACLPI* were strongly induced by flg22. To further monitor the gene expression of *PP2-B13*  
203 and *ACLPI* upon elicitor perception and to validate the RNA-seq results, we analyzed  
204 expression levels by quantitative real-time PCR (qRT-PCR) in leaves of four-week-old  
205 Arabidopsis plants at different time points. We confirmed that also at this later developmental  
206 stage, expression of *PP2-B13* and *ACLPI* was strongly induced (100-fold for *PP2-B13* and  
207 12-fold for *ACLPI*) within 30 minutes after flg22 treatment (Fig. 2). Two and six hours after  
208 elicitor treatment, expression levels of *PP2-B13* had returned to pre-treatment levels, while  
209 those of *ACLPI* remained only slightly elevated (Fig. 2). This expression pattern suggests that  
210 both genes might be involved in early defense response.

211

### 212 **Increased susceptibility to *Pseudomonas syringae* pv. *tomato* mutant *hrcC-* in *pp2-b13*** 213 **and *aclp1* mutant lines**

214 Two days post inoculation of leaves with *Pst hrcC-*, the bacterial titer for wild type  
215 Arabidopsis reached 109,000 cfu/cm<sup>2</sup>, while for *pp2-b13* mutant lines it increased  
216 significantly to 325,000 cfu/cm<sup>2</sup> ( $p = 0.0261$ ), albeit not as drastically as that of *sid2-2*  
217 mutants. The protein encoded by *PP2-B13* is a phloem protein containing the F-box domain  
218 Skp2. It also has a described function in carbohydrate binding<sup>48</sup>.

219 The protein encoded by *ACLPI* is of unknown function with the highest similarity to actin  
220 cross-linking proteins and includes a fascin domain. As it can be seen in Fig. 4, 48 hours post  
221 inoculation of leaves with *Pst hrcC-*, the bacterial titer for wild type Arabidopsis, reached  
222 109000 cfu/cm<sup>2</sup> while for the *aclp1* mutant line, it increased significantly to 257000 cfu/cm<sup>2</sup>  
223 ( $p = 0.0089$ ).

224 In conclusion, these results suggest that *PP2-B13*, and *ACLPI* play a role in defense signaling  
225 and that both genes are required for wild-type levels of resistance against *Pst hrcC-*.



226 **Differential ethylene production in *pp2-b13* and *aclp1* plants, as compared to the wild**  
227 **type Arabidopsis**

228 To analyze the early defense responses upon elicitor treatment, we assessed ethylene (ET)  
229 production in response to flg22 treatment in the mutant lines *pp2-b13*, and *aclp1*. We  
230 observed that mutant line *aclp1* displayed a significantly reduced ET production in  
231 comparison to wild-type Arabidopsis upon treatment with 1  $\mu$ M flg22 ( $p$ -value = 0.0295; Fig.  
232 5). This suggests that ACLP1 is involved in the enhancement of ET production in response to  
233 flg22 perception.

234 **Differential Reactive Oxygen Species Generation in *pp2-b13* and *aclp1* plants, as**  
235 **compared to the wild type Arabidopsis**

236 One of the early responses triggered by MAMPs and DAMPs is the production of apoplastic  
237 ROS by the Arabidopsis NADPH-oxidases RbohD and RbohF protein<sup>19</sup>. We observed that in  
238 the treated leaf discs upon flg22 perception, *pp2-b13* displayed a lower ROS production  
239 compared to wild-type (Fig. 6A), indicating that PP2-B13 might play a role in early PTI by  
240 enhancing the oxidative burst in response to the flg22 perception. In contrast, *aclp1*, although  
241 exhibiting deficiency in ET production upon flg22 perception, showed robust enhancement of  
242 ROS production at levels similar to that of wild-type (Fig. 6A).

243 When comparing maximum ROS production the two mutant lines and wild-type, we did not  
244 observe statistically significant differences, in contrast to the *fls2* mutant which displayed no  
245 ROS production at all in response to flg22 (Fig. 6B).

246 **FLS2 receptor abundance in *pp2-b13* and *aclp1* mutants were similar to the wild type**  
247 **Arabidopsis**

248 The *PP2-B13* and *ACLPI* genes were strongly induced upon elicitor treatment, as seen in the  
249 RNA-seq and qPCR data. Additionally, both mutant lines were deficient in early PTI  
250 responses (ET and ROS measurement). Hence it is conceivable that the products of the *PP2-*  
251 *B13* and *ACLPI* genes affect the abundance of FLS2 receptor. However, FLS2 analysis via  
252 immunoblots showed that both mutant lines had similar levels of FLS2 as the wild-type (Fig.  
253 7), indicating that these genes do not play a role in regulating the abundance of the FLS2  
254 receptor.

255 **Discussion**

256 Plants are under constant exposure to microbial signals from potential pathogens, potential  
257 commensals, and mutualists. The plant cell immune sensors are able sense these signals and  
258 expand the defense against pathogens<sup>1,20,49-50</sup>. Host-pathogen interactions encompass a



259 complex set of events that are dependent on the nature of the interacting partners,  
260 developmental stage, and environmental conditions<sup>1,50-51</sup>. These interactions are regulated  
261 through diverse signaling pathways that ultimately result in altered gene expression<sup>1,23,42</sup>.  
262 Membrane-resident pattern recognition receptors (PRRs) that are located on the cell surface  
263 can sense and perceive microbe-derived signature components known as microbe-associated  
264 molecular patterns (MAMPs) and also damage-associated molecular patterns (DAMPs),  
265 leading to pattern-triggered immunity<sup>1-4</sup>.

266 In the current study, global gene expression profiling of wild type Arabidopsis seedlings  
267 resulted in the identification of a large number of genes induced by flg22 and AtPep1 that had  
268 not been detected by the ATH-1 array technology. Among them, we focused on two, namely  
269 *PP2-B13*, and *ACLPI*. We observed noticeable up-regulation in wild type Arabidopsis for  
270 both of these genes upon flg22 treatment (Fig. 2). Reverse-genetic studies of *PP2-B13* and  
271 *ACLPI* genes showed that these genes are required to control infection by the bacterial  
272 pathogens *P. syringae* pv. *tomato* mutant *hrcC*- (*Pst hrcC*-; Fig. 4). Our results highlight the  
273 general usefulness of transcriptomic approaches to identify new players in early defense  
274 responses in innate immunity and reveal two new players, PP2-B13 and ACLP1, in this  
275 pathway. It should be noted that extending the time points of the elicitor treatment in future  
276 studies might help uncover additional players in innate immunity.

277 PP2-B13<sup>48</sup> is an F-box protein with homology to PP2-B14<sup>52</sup>. The F-Box domain of PP2-B13  
278 is close to the N-terminus of the protein. PP2-B13 shows the highest similarity in amino acid  
279 sequence with AT1G56250, which formerly was reported as an F-box protein<sup>52</sup>. Zhang *et al.*,  
280 (2011)<sup>53</sup> showed that PP2-B13 and PP2-B14 were highly abundant in phloem upon aphid  
281 infection. These genes are located in a cluster of defense-related genes, which supports that  
282 hypothesis that they play a role in the defense signaling network.

283 Sequence alignment of PP2-B13 with homologues from other plant species revealed  
284 conserved features (Fig. 8). A phylogenetic analysis supported high conservation of PP2-B13-  
285 like proteins across different plant species, suggesting similar function (Supplementary Fig.  
286 S7). *In silico* structural analysis using Raptor X<sup>54</sup> predicted two domains (Supplementary Fig.  
287 S5): an N-terminal F-box domain (residues 4-46; Fig. 8) and a C-terminal PP2 domain  
288 (residues 93-280; Fig. 8). PP2-domain proteins are one of the most abundant and enigmatic  
289 proteins in the phloem sap of higher plants<sup>55-56</sup>. It was reported that lectin domain proteins are  
290 important in plant defense responses, and so far 10 membrane-bound lectin type PRRs, which  
291 are involved in plant defense signaling and symbiosis, have been identified<sup>56</sup>. Recently,  
292 Eggermont *et al.* (2017)<sup>57</sup> showed that lectins are linked to other protein domains which are

293 identified to have a role in stress signaling and defense.

294 Lectins are proteins containing at least one non-catalytic domain which enables them to  
295 selectively recognize and bind to specific glycans that are either present in a free form or are  
296 part of glycoproteins and glycolipids and help the plants to sense the presence of pathogens;  
297 as a defense response they use a broad variety of lectin domains to interact with pathogens<sup>58</sup>.  
298 Additionally, Eggermont et al., (2017)<sup>57</sup> showed that among lectin proteins, the amino acids  
299 responsible for carbohydrate binding are highly conserved. Furthermore, Jia et al (2015)<sup>58</sup>,  
300 showed that PP2-B11, (another member of the phloem lectin proteins<sup>48</sup>) is highly induced in  
301 response to salt treatment at both transcript and protein levels. They showed that PP2-B11  
302 plays a positive role in response to salt stress.

303 In order to predict PP2-B13 interaction partners, we submitted the PP2-B13 amino acid  
304 sequence to the STRING database (version 11.0), which hypothetically determines protein–  
305 protein interactions based on computational prediction methods<sup>59</sup>. This returned several major  
306 players in innate immunity, specifically PBL1, RLP6 and RLP15, which are important  
307 defense proteins, as potential interaction partners (Fig. 9)<sup>60-62</sup>. RLPs are regarded major  
308 players in immune system in *Arabidopsis*<sup>60-62</sup>. STRING also predicted interactions of PP2-  
309 B13 with major zinc transporter proteins (ZIPs), which have role in biotic and abiotic stress  
310 responses<sup>63</sup>.

311 In the region of the chromosome 1 where PP2-B13 is located, there are many genes which are  
312 activated upon biotic or abiotic stresses, such as AT1G56280. The protein product of this  
313 gene is named drought-induced protein 19 (Di19), because its expression increases due to  
314 progressive drought stress<sup>64</sup>. Importantly, we have found that the *WRR4* gene (*AT1G56510*) is  
315 downstream of the *PP2-B13* (Supplementary Fig. S2). *WRR4* is one of the most important  
316 defense gene in *Arabidopsis thaliana*<sup>64-65</sup>.

317 ACLP1 is an actin cross-linking protein of 397 amino acids. Raptor X<sup>54</sup> predicted two Fascin  
318 motifs in the N-terminal and C-terminal domains (residues 18-70 and 229-318, respectively;  
319 Fig. 10; Supplementary Fig. S6). The conserved domain database at NCBI  
320 (<https://www.ncbi.nlm.nih.gov/Structure/cdd/cdd.shtml>) also identified two fascin domains in  
321 ACLP1. Fascins are a structurally unique and evolutionarily highly conserved group of actin  
322 cross-linking proteins. Fascins function in the organization of two major forms of actin-based  
323 structures: dynamic, cortical cell protrusions and cytoplasmic microfilament bundles<sup>67-69</sup>. For  
324 ACLP1 the sequence Logo was created. As shown in the Figure 10, there are several

325 conserved regions in the ACLP1 and its homologues. Furthermore, a phylogenetic analysis  
326 supported high conservation of ACLP1-like proteins across different land plant species,  
327 suggesting similar function (Supplementary Fig. 9).

328

329 MAMP perception changes actin arrangements and leads to cytoskeleton remodeling<sup>70-71</sup>.  
330 Cytoskeleton rapidly responds to biotic stresses to supports cellular fundamental processes<sup>72-</sup>  
331 <sup>74</sup>. Recently, Henty-Ridilla et al., (2014)<sup>75</sup> confirmed that Actin depolymerizing factor 4  
332 (ADF4) has an important role in defense response through cytoskeleton remodeling. They  
333 showed that the *adf4* mutant was unresponsive to a bacterial MAMP<sup>76</sup>. Using the STRING  
334 database (version 11.0), we predicted many actin related proteins including ADF4, ACT2,  
335 ACT12, PFN2, MRH2, ARK2 and ADF1 as putative interaction partner for ACLP1 (Fig. 9),  
336 further corroborating a potential role for ACLP in defense-related actin reorganization. It is  
337 noteworthy that downstream of the *ACLP1*, there is *PP2-A5* gene (Supplementary Fig. S3).  
338 The protein product of PP2-A5 gene is another member of the Phloem Protein 2 family. The  
339 role of PP2-A5 in defense response against insect is already confirmed<sup>77</sup>.

#### 340 **Conclusions and outlook**

341 We observed a strong (>100fold) and very rapid but transient induction of *PP2-B13* and  
342 *ACLP1* within 30 min of flg22 elicitor treatment (Fig. 2). Using a mutant approach, we  
343 provide evidence that loss-of-function mutations in *PP2-B13* and *ACLP1* can affect the early  
344 PTI responses including ET and ROS measurements (Fig. 5 and Fig. 6). We could show a  
345 defect in activation of ET production for *aclp1* plants and also attenuated ROS generation in  
346 *pp2-b13* plants in response to flg22 treatment. ROS accumulation is regarded as an early PTI  
347 event occurring a few minutes after *Pst* inoculation<sup>1</sup>. These findings suggest that these genes  
348 might have a function through interaction with PTI signaling pathways during bacterial  
349 infection. However, we cannot yet determine at what point of the MAMP signaling cascade  
350 the products of these genes function. Therefore, subsequent studies are needed to determine  
351 the relationship of these genes in MAMP recognition and other signaling cascades in innate  
352 immunity.

353 Furthermore, one important finding in this study is that our study reconfirm the importance of  
354 the chromosome 1 in innate immunity as there many resistant genes that their protein product  
355 have role in defense including ACLP1, Di19, PP2-A5, PP2-B13, WWR4 and VBF. Therefore,  
356 we suggest that in further studies, this region of the chromosome 1 should be evaluated in  
357 depth to identify more genes which have role in innate immunity.

358 In conclusion, based on what we have observed in different experiments, it can be concluded  
359 that PP2-B13 and ACLP1 have a role in innate immunity. It is likely that the protein products  
360 of these genes can have multiple functions in innate immunity in Arabidopsis. It has been  
361 previously reported that the genes which have a function in innate immunity in Arabidopsis  
362 can also have role in resistance against abiotic stress<sup>78</sup>. Hence, it will be interesting to see the  
363 response of these mutant plants upon abiotic stresses such as salinity, cold, and drought.

## 364 **Materials and Methods**

### 365 **Plant material and growth conditions**

366 All Arabidopsis genotypes were derived from the wild-type accession Columbia-0 (Col-0).  
367 The plants were grown as one plant per pot at 10 h photoperiod light at 21°C and 14 h dark at  
368 18°C, with 60% humidity for 4 to 5 weeks, or were grown on plates containing Murashige  
369 and Skoog (MS) salts medium (Sigma, Aldrich), 1% sucrose, and 1% agar with a 16 h  
370 photoperiod. Seeds of the *sid2* mutant line were kindly provided by Jean-Pierre Métraux  
371 (University of Fribourg). The *fls2* mutant line was previously published<sup>23</sup>. *pp2-b13*  
372 (AT1G56240; SALK\_144757.54.50), and *aclp1* (AT1G69900; SALK\_68692.47.55) were  
373 obtained from the Nottingham Arabidopsis Stock Centre (NASC).

### 374 **Peptide treatments**

375 The peptides used as elicitors were flg22 (QRLSTGSRINSAKDDAAGLQIA), and *AtPep1*  
376 (ATKVKAKQRGKEKVSSGRPGQHN). The peptides were ordered from EZBiolabs  
377 (EZBiolab Inc., IN, USA), dissolved in a BSA solution (containing 1 mg/mL bovine serum  
378 albumin and 0.1 M NaCl), and kept at -20°C. In order to prepare sterile seedlings,  
379 Arabidopsis seeds were washed with 99% ethanol supplemented with 0.5% Triton for 1 min,  
380 washed with 50% ethanol supplemented with 0.5% Triton for 1 min, then washed with 100%  
381 ethanol for 2 min. Seeds were sown on MS salt medium supplemented with 1% sucrose and  
382 0.8% Phytigel (Sigma-Aldrich) at pH 5.7. Subsequently, the plates were stratified for 2 d at  
383 4°C and germinated at 21°C under continuous light (MLR-350; Sanyo chamber). One day  
384 before treatment, the seedlings were moved from plates to ddH<sub>2</sub>O. One-week-old Arabidopsis  
385 seedlings were treated with *AtPep1* and flg22 (1 μM) for 30 min. BSA solution was used for  
386 the mock-treated control.

### 387 **RNA isolation, Illumina sequencing and quality control**

388 Total RNA was isolated from one-week-old Arabidopsis seedlings using the RNeasy Plant  
389 Mini Kit (Qiagen), according to the manufacturer's protocol. Three individual biological  
390 replicates were used per condition. RNA purity, concentration, and integrity were determined  
391 via spectrophotometric measurement on a NanoDrop 2000 (Thermo-Scientific). Libraries  
392 were prepared using the RNA sample preparation kit (Illumina) according to the  
393 manufacturer's instructions (Illumina). Libraries were sequenced on a HiSeq2000 instrument  
394 (Illumina) as 100 bp single-end reads. Sequencing quality of the fastq files from the RNA-Seq  
395 data was examined by FastQC software (version V0.10.1;  
396 <http://www.bioinformatics.babraham.ac.uk/projects/fastqc/>). Adapter sequences were clipped  
397 and low quality reads were either trimmed or removed.

### 398 **Mapping reads to the reference genome and analysis of differentially expressed genes** 399 **(DEGs)**

400 RNA-seq reads were aligned against the *A. thaliana* cDNA reference genome (TAIR10;  
401 <https://www.arabidopsis.org/>). The reference genome index was constructed with Bowtie  
402 v2.2.3 and reads were aligned to the Arabidopsis reference genome using TopHat v2.0.12  
403 with default parameters<sup>46</sup>. The resulting alignments were visualized using Integrative  
404 Genomics Viewer (IGV)<sup>79</sup>. To evaluate differentially expressed genes between elicitor-treated  
405 and control samples, we used the DESeq2 R package<sup>80-81</sup>. Genes with an adjusted *p*-value <  
406 0.05 and a minimum two-fold change in expression were considered as differentially  
407 expressed.

### 408 **Selection of candidate genes**

409 Because we were interested in genes not yet classified as related to immune response, we  
410 applied several filters: from the genes significantly up-regulated after 30 minutes of flg22 or  
411 AtPep1 treatment, we discarded those which had previously been reported as differentially  
412 regulated and implicated in biotic and abiotic stress response<sup>23,40,41</sup>. We selected a subset of 85  
413 genes (Supplementary File 10) based on the following criteria: 1) high induction of  
414 transcription in response to both flg22 and AtPep1 treatments, 2) not present on Affymetrix  
415 ATH-22k microarray chips, 3) no published function or at least not connected to defense, and  
416 4) not a member of a large gene family (in order to avoid potential functional redundancy).  
417 From this list, we eventually selected 20 genes as candidate genes for further analyses (Table  
418 1) and ordered corresponding T-DNA insertion lines ([http://signal.salk.edu/cgi-  
419 bin/tdnaexpress](http://signal.salk.edu/cgi-bin/tdnaexpress)) from NASC ([www.arabidopsis.info](http://www.arabidopsis.info)).

## 420 **Determination of gene expression by quantitative real-time RT-PCR analysis**

421 Discs of leaves of four-week-old *Arabidopsis* plants were cut out using a sterile cork borer  
422 (d=7mm) and placed overnight in ddH<sub>2</sub>O in 5 cm Petri dish. Thereafter, the experiment  
423 started (time zero) with the addition of 1 μM flg22, dissolved in BSA solution (1 mg/mL  
424 bovine serum albumin and 0.1 M NaCl). BSA solution without flg22 was used for the mock-  
425 treated control., In order to produce a time course in response to flg22 treatment, the  
426 experiment was stopped after 30 min, 2 h and 6 h, Total RNA from leaves of four-week-old  
427 *Arabidopsis* plants was extracted using the NucleoSpin RNA plant extraction kit (Macherey-  
428 Nagel) and treated with rDNase according to the manufacturer's extraction protocol. RNA  
429 quality of all samples was assessed using NanoDrop 2000 (Thermo-Scientific). To synthesize  
430 the cDNA, 10 ng of RNA was used with oligo (dT) primers and AMV reverse transcriptase  
431 and reverse transcription was performed according to the manufacturer's instructions  
432 (Promega). Using a GeneAmp 7500 Sequence Detection System (Applied Biosystems),  
433 quantitative RT-PCR was performed in a 96-well format. The gene-specific primers used in  
434 this study are listed in Supplementary Table S2. Expression of *UBQ10* (AT4G05320), which  
435 has been validated for gene expression profiling upon flg22 treatment<sup>82-84</sup>, was used as the  
436 reference gene. Based on C<sub>T</sub> values and normalization to *UBQ10* (AT4G05320) expression,  
437 the expression profile for each candidate gene was calculated using the qGene protocol<sup>83-84</sup>.

## 438 **Analysis of T-DNA insertion mutants**

439 After grinding leaf material in liquid nitrogen, total DNA was extracted using EDM-Buffer  
440 (200 mM Tris pH7.5; 250 mM NaCl, 25 mM EDTA; 0.5% SDS). Putative T-DNA insertion  
441 mutants were genotyped by PCR. We designed gene specific primer pairs LP and RP based  
442 on the predicted genomic sequence surrounding the T-DNA insertion (Supplementary Table  
443 S2). The plants were considered homozygous mutants if there was a PCR product with T-  
444 DNA-specific border primers LP/ LBa1 but not with the LP/RP primers. (Table 1). We  
445 obtained T-DNA insertion mutants of six single homozygous lines bearing a disruption in the  
446 gene, including AT1G56240 (*PP2-B13*) and AT1G69900 (*ACLPI*) (Table 1).

## 447 **RT-PCR experiment**

448 For total RNA extraction, samples of leaf tissue from 4-week-old *Arabidopsis* including wild  
449 type plants (Col0), *pp2-b13*, and *aclp1* were harvested into liquid nitrogen and were grounded  
450 with the sterile mortar and pestle. The NucleoSpin RNA Prep Kit (BioFACT<sup>TM</sup>, South Korea)  
451 was used for RNA extraction according to the manufacturer's instructions and DNase-treated.



452 Reverse transcription was performed at 50°C for 45 minutes using total RNA, a reverse  
453 transcriptase (BioFACT™, South Korea) and an oligo (dT)20 primer (BioFact, South Korea)  
454 supplemented with 0.5ul RNase inhibitor (BioFACT™, South Korea) and according to the  
455 manufacturer's instructions. To ensure specificity and accuracy of each primer and to design  
456 the highly specific primers for *PP2-B13* and *ACLPI* transcripts, the oligonucleotide primers  
457 were designed by AtRTPrimer program<sup>85</sup> which exclusively determine specific primers for  
458 each individual transcript in Arabidopsis. The housekeeping gene *ACTIN2* was used as a  
459 positive control for each PCR. The primers for *ACTIN 2* transcript were used as described  
460 previously<sup>86</sup>. Primers that were used in these experiments are listed in Supplementary Table  
461 S2.

#### 462 **Bacterial growth assay**

463 *Pseudomonas syringae* pathovar *tomato* mutant *hrcC*- (deficient in type three effector  
464 secretion system)<sup>87,88</sup>; was grown in 20 ml liquid YEB medium supplemented with 50 µg/ml  
465 Rifampicin on a shaker at 28°C overnight. Infection assay and counting the bacterial titer was  
466 done as described previously<sup>89</sup> with a bacterial suspension at OD<sub>600</sub> = 0.0002. Leaves of 4-5-  
467 week-old Arabidopsis plants were infiltrated using a syringe. The *sid2-2* mutant plants, which  
468 are incapable of accumulating salicylic acid<sup>90</sup>, were used as a positive control. Mock-infected  
469 plants were similarly treated with infiltration buffer.

#### 470 **Measurement of ethylene production**

471 Leaf material of Arabidopsis plants was cut into discs of 10 mm<sup>2</sup> using a sterile cork borer, at  
472 the end of the light period. After mixing leaf strips from several plants, six leaf strips were  
473 placed together in a 6 ml glass vial containing 0.5 ml of ddH<sub>2</sub>O. Vials with leaf strips were  
474 incubated overnight in the dark in a short-day room (16 h dark / 8 h light). The following day  
475 (approximately after 16 h), elicitor peptide was added to the desired final concentration (1  
476 µM) and vials were closed with air-tight rubber septa and put in the short-day room. ET  
477 accumulating in the free air space was measured by gas chromatography (GC-14A Shimadzu)  
478 after 4 h of incubation with or without elicitor.

#### 479 **ROS measurement**

480 Using a sterile cork borer, leaf discs of approximately 10 mm<sup>2</sup> were cut from several plants.  
481 One leaf disc per well was left floating overnight in darkness in 96-well plates (LIA White,  
482 Greiner Bio-One) on 100 µl ddH<sub>2</sub>O at 18°C. Horseradish peroxidase (1 µg/ml final



483 concentration), luminol (100  $\mu$ M final concentration) and elicitor peptide (1  $\mu$ M final  
484 concentration) were added to the wells. Using a plate reader (MicroLumat LB96P, Berthold  
485 Technologies) light emission of oxidized luminol in the presence of peroxidase was  
486 determined over 30 min, starting from addition of the elicitor.

#### 487 **Immunoblot analysis**

488 150 mg of leaf material from 4-5-week-old Arabidopsis plants was shock-frozen and ground  
489 in liquid nitrogen. 200  $\mu$ l Lämmli buffer containing 50 mM  $\beta$ -mercaptoethanol was added  
490 and the ground homogenate was further mixed by vortexing. Proteins were denatured by  
491 boiling for 10 min at 95 °C. Debris was pelleted by centrifugation for 5 min at 13,000 rpm.  
492 Total proteins were separated by electrophoresis in 7% SDS-polyacrylamide gels and  
493 electrophoretically transferred to a polyvinylidene fluoride membrane according to the  
494 manufacturer's protocol (Bio-Rad). Transferred proteins were detected with Ponceau-S. The  
495 abundance of FLS2 receptor was analyzed by immunoblot and immunodetection with anti-  
496 FLS2-specific antibodies as previously described<sup>91</sup>.

#### 497 **Phylogenetic analysis and comparison consensus of the amino acid sequences**

498 Protein sequences BB2-B13 and ACLP1 were used as queries using BLASTP<sup>92</sup> (Basic Local  
499 Alignment Search Tool) search to identify the most similar proteins in *A. thaliana* and diverse  
500 land plants. We applied a cutoff of 70%  $\leq$  sequence identity on the top hit of the BLASTP  
501 search for BB2-B13 and ACLP1 and their orthologous and prologues were identified. Protein  
502 sequences with more than 70% sequence identity were downloaded from the NCBI database  
503 and multiple alignment analysis performed based on the ClustalW software<sup>93</sup>. Phylogenetic  
504 analyses and graphical representation were carried out using MEGA software (Molecular  
505 Evolutionary Genetics Analysis) version 6.0<sup>94</sup>. A neighbor-joining phylogenetic tree was  
506 constructed after 1,000 iterations of bootstrapping of the aligned sequences. All branches with  
507 bootstrap values <60% were collapsed. To compare consensus of the amino acid sequences,  
508 sequence logos were generated using WebLogo ([http:// www.weblogo.berkeley.edu/](http://www.weblogo.berkeley.edu/)), using  
509 the ClustalW alignment as input.

510

#### 511 **References**

512 1. Boller, T. & Felix, G. A renaissance of elicitors: perception of microbe-associated  
513 molecular patterns and danger signals by pattern-recognition receptors. *Annu. Rev.*  
514 *Plant Biol.* **60**, 379–406 (2009).

- 515 2. Felix, G., Duran, J. D., Volko, S. & Boller, T. Plants have a sensitive perception  
516 system for the most conserved domain of bacterial flagellin. *Plant J.* **18**, 265–276  
517 (1999).
- 518 3. Bigeard, J., Colcombet, J. & Hirt, H. Signaling mechanisms in pattern-triggered  
519 immunity (PTI). *Mol. Plant* **8**, 521–539 (2015).
- 520 4. Macho, A. P. & Zipfel, C. Plant PRRs and the activation of innate immune  
521 signaling. *Mol. Cell* **24**, 263–272 (2014).
- 522 5. Couto, D. & Zipfel, C. Regulation of pattern recognition receptor signaling in  
523 plants. *Nat. Rev. Immunol.* **16**, 537–552 (2016).
- 524 6. Nobori, T. *et al.* Velásquez, A.C. Wu, J, Kvitko BH, Kremer JM, Wang Y, He SY,  
525 Tsuda K. Transcriptome landscape of a bacterial pathogen under plant immunity.  
526 *Proc. Natl Acad. Sci. USA* **27**;115(13):E3055–E3064 (2018).
- 527 7. Li, B., Meng, X., Shan, L. & He, P. Transcriptional Regulation of Pattern-Triggered  
528 Immunity in Plants. *Cell Host Microbe.* **11**, 641–650 (2016).
- 529 8. Saijo, Y., Loo, E. P. & Yasuda, S. Pattern recognition receptors and signaling in  
530 plant-microbe interactions. *Plant J.* **93**, 592–613. (2018).
- 531 9. Gómez-Gómez, L. & Boller, T. FLS2: an LRR receptor-like kinase involved in the  
532 perception of the bacterial elicitor flagellin in Arabidopsis. *Mol. Cell.* **5**, 1003–1011.  
533 (2000).
- 534 10. Zipfel, C. *et al.* Perception of the bacterial PAMP EF-Tu by the receptor EFR  
535 restricts Agrobacterium-mediated transformation. *Cell* **19**, 749–760 (2006).
- 536 11. Huffaker, A., Pearce, G. & Ryan, C. A. An endogenous peptide signal in  
537 Arabidopsis activates components of the innate immune response. *Proc. Natl. Acad.*  
538 *Sci. USA* **103**, 10098–10103 (2006).
- 539 12. Bartels, S. & Boller, T. Quo vadis, Pep? Plant elicitor peptides at the crossroads of  
540 immunity, stress and development. *J. Exp Bot.* **66**, 5183–5193 (2015).
- 541 13. Hander, T. *et al.* Damage on plants activates Ca(2+)-dependent metacaspases for  
542 release of immunomodulatory peptides. *Science* **363**, 6433.  
543 <http://dx.doi.org/10.1126/science.aar7486>. (2019).
- 544 14. Safaeizadeh, M. & Boller, T. Differential and tissue-specific activation pattern of  
545 the AtPROPEP and AtPEPR genes in response to biotic and abiotic stress in  
546 Arabidopsis thaliana. *Plant Signal Behav.* **14**, e1590094.  
547 <https://doi.org/10.1080/15592324.2019.1590094> (2019).
- 548 15. Yamaguchi, Y. & Huffaker, A. Endogenous peptide elicitors in higher plants. *Curr.*

- 549            *Opin Plant Biol.* **14**, 351–357 (2011).
- 550            16. Yamaguchi, Y., Huffaker, A., Bryan, A. C., Tax, F. E. & Ryan, C. A. PEPR2 is a  
551            second receptor for the Pep1 and Pep2 peptides and contributes to defense responses  
552            in Arabidopsis. *Plant Cell* **22**, 508–522 (2010).
- 553            17. Yamaguchi, Y., Pearce, G. & Ryan, C. A. The cell surface leucine-rich repeat  
554            receptor for AtPep1, an endogenous peptide elicitor in Arabidopsis, is functional in  
555            transgenic tobacco cells. *Proc. Natl Acad. Sci. USA* **27**, 10104–10109.  
556            <https://doi.org/10.1073/pnas.0603729103> (2006).
- 557            18. Chinchilla, D. *et al.* A flagellin-induced complex of the receptor FLS2 and BAK1  
558            initiates plant defence. *Nature* **448**, 497–500 (2007).
- 559            19. Torres, M. A., Jones, J. D. G. & Dangl, J.L. Reactive oxygen species signaling in  
560            response to pathogens. *Plant Physiol.* **141**, 373–378 (2006).
- 561            20. Jones, J. D. G., Vance, R.E. & Dangl, J.L. Intracellular innate immune surveillance  
562            devices in plants and animals. *Science* **354**, aaf6395.  
563            <https://doi.org/10.1126/science.aaf6395> (2016).
- 564            21. Thilmony, R., Underwood, W. & He, S.Y. Genome-wide transcriptional analysis of  
565            the Arabidopsis thaliana interaction with the plant pathogen *Pseudomonas syringae*  
566            pv. tomato DC3000 and the human pathogen *Escherichia coli* O157:H7. *Plant J.* **46**,  
567            34–53 (2006).
- 568            22. Truman, W., Bennett, M. H., Kubigsteltig, I., Turnbull, C. & Grant, M. Arabidopsis  
569            systemic immunity uses conserved defense signaling pathways and is mediated by  
570            jasmonates. *Proc. Natl. Acad. Sci. USA* **16**, 1075–1080 (2007).
- 571            23. Zipfel, C. *et al.* Bacterial disease resistance in Arabidopsis through flagellin  
572            perception. *Nature.* **15**, 764–767 (2004).
- 573            24. Hauck, P., Thilmony, R. & He, S. Y. A *Pseudomonas syringae* type III effector  
574            suppresses cell wall-based extracellular defense in susceptible Arabidopsis plants.  
575            *Proc. Natl. Acad. Sci. USA* **8**, 8577–8582 (2003).
- 576            25. Schwessinger, B. & Zipfel, C. News from the frontline: recent insights into PAMP-  
577            triggered immunity in plants. *Curr. Opin. Plant Biol.* **11**, 389–395 (2008).
- 578            26. Hann, D. R. & Rathjen, J. P. Early events in the pathogenicity of *Pseudomonas*  
579            *syringae* on *Nicotiana benthamiana*. *Plant J.* **49**, 607–618 (2007).
- 580            27. Göhre, V. & Robatzek, S. Breaking the barriers: microbial effector molecules  
581            subvert plant immunity. *Annu. Rev. Phytopathol.* **46**, 189–215 (2008).

- 582 28. Gimenez-Ibanez, S. *et al.* AvrPtoB targets the LysM receptor kinase CERK1 to  
583 promote bacterial virulence on plants. *Curr. Biol.* **10**, 423–429 (2009).
- 584 29. Shan, L. *et al.* Bacterial effectors target the common signaling partner BAK1 to  
585 disrupt multiple MAMP receptor-signaling complexes and impede plant immunity.  
586 *Cell Host Microbe.* **17**, 17–27 (2008).
- 587 30. Xiang, Y., Tang, N., Du, H., Ye, H. & Xiong, L. Characterization of OsbZIP23 as a  
588 key player of the basic leucine zipper transcription factor family for conferring  
589 abscisic acid sensitivity and salinity and drought tolerance in rice. *Plant Physiol.*  
590 **148**, 1938–1952. (2008).
- 591 31. Whalen, M. C., Innes, R. W., Bent, A. F. & Staskawicz, B. J. Identification of  
592 *Pseudomonas syringae* pathogens of Arabidopsis and a bacterial locus determining  
593 avirulence on both Arabidopsis and soybean. *Plant Cell* **3**, 49–59 (1991).
- 594 32. Lindeberg, M., Cunnac, S. & Collmer, A. *Pseudomonas syringae* type III effector  
595 repertoires: last words in endless arguments. *Trends Microbiol.* **20**, 199–208 (2012).
- 596 33. Xin, X. F. & He, S. Y. *Pseudomonas syringae* pv. tomato DC3000: a model  
597 pathogen for probing disease susceptibility and hormone signaling in plants. *Annu.*  
598 *Rev. Phytopathol.* **51**, 473–498 (2013).
- 599 34. Büttner, D. & He, S. Y. Type III protein secretion in plant pathogenic bacteria.  
600 *Plant Physiol.* **150**, 1656–1664 (2009).
- 601 35. Jones, J. D. G. & Dangl, J. L. The plant immune system. *Nature* **444**, 323–329.  
602 (2006)
- 603 36. Kunkel, B.N. & Brooks, D.M. Cross talk between signaling pathways in pathogen  
604 defense. *Curr. Opin. Plant Biol.* **5**, 325–331 (2002).
- 605 37. Ulker, B. & Somssich, I.E. WRKY transcription factors: from DNA binding  
606 towards biological function. *Curr. Opin. Plant Biol.* **7**, 491–498 (2004).
- 607 38. Tao, Y. *et al.* Quantitative nature of Arabidopsis responses during compatible and  
608 incompatible interactions with the bacterial pathogen *Pseudomonas syringae*. *Plant*  
609 *Cell* **15**, 317–330 (2003).
- 610 39. Lyons, R. *et al.* The RNA-binding protein FPA regulates flg22-triggered defense  
611 responses and transcription factor activity by alternative polyadenylation. *Sci. Rep.*  
612 **3**, 2866. <https://doi.org/10.1038/srep02866> (2013).
- 613 40. Navarro, L. *et al.* The transcriptional innate immune response to flg22. Interplay and  
614 overlap with Avr gene-dependent defense responses and bacterial pathogenesis.  
615 *Plant Physiol.* **135**, 1113–1128 (2004).

- 616 41. Denoux C. *et al.* Activation of defense response pathways by OGs and Flg22  
617 elicitors in Arabidopsis seedlings. *Mol. Plant* **1**, 423–445.
- 618 42. Stark, R., Grzelak, M. & Hadfield, J. RNA sequencing: the teenage years. *Nat. Rev.*  
619 *Genet.* **20**, 631–656 (2019).
- 620 43. Mutz, K. O., Heilkenbrinker, A., Lönne, M. Walter, J. G. & Stahl, F. Transcriptome  
621 analysis using next-generation sequencing. *Curr. Opin. Biotechnol.* **24**, 22–30  
622 (2013).
- 623 44. Wang, Z., Gerstein, M. & Snyder, M. RNA-Seq: a revolutionary tool for  
624 transcriptomics. *Nat. Rev. Genet.* **10**, 57–63 (2009).
- 625 45. Martin, J. A. & Wang, Z. Next-generation transcriptome assembly. *Nat. Rev. Genet.*  
626 **7**, 671–682 (2011).
- 627 46. Love, M. I., Huber, W. & Anders, S. Moderated estimation of fold change and  
628 dispersion for RNA-seq data with DESeq2. *Genome Biol.* **15**, 550.  
629 <https://doi.org/10.1186/s13059-014-0550-8> (2014).
- 630 47. Swarbreck, D. *et al.* The Arabidopsis Information Resource (TAIR): gene structure  
631 and function annotation. *Nucleic Acids Res.* **36**, 1009-1014. (2008).
- 632 48. Dinant, S. *et al.* Diversity of the superfamily of phloem lectins (phloem protein 2) in  
633 angiosperms. *Plant Physiol.* **131**, 114–128 (2003).
- 634 49. Boutrot, F. & Zipfel, C. Function, Discovery, and Exploitation of Plant Pattern  
635 Recognition Receptors for Broad-Spectrum Disease Resistance. *Annu. Rev.*  
636 *Phytopathol.* **4**, 257–286 (2017).
- 637 50. Dangl, J. L., Horvath, D. M. & Staskawicz, B. J. Pivoting the plant immune system  
638 from dissection to deployment. *Science* **16**, 341 (2013).
- 639 51. Katagiri, F., Thilmony, R. & He, S. Y. The Arabidopsis thaliana-pseudomonas  
640 syringae interaction. *Arabidopsis* **1**, e0039. <https://doi.org/10.1199/tab.0039> (2002).
- 641 52. Zaltsman, A., Krichevsky, A., Loyter, A. & Citovsky, V. Agrobacterium induces  
642 expression of a host F-box protein required for tumorigenicity. *Cell Host Microbe.*  
643 **18**, 197–209 (2010).
- 644 53. Zhang, C. *et al.* Harpin-induced expression and transgenic overexpression of the  
645 phloem protein gene AtPP2-A1 in Arabidopsis repress phloem feeding of the green  
646 peach aphid Myzus persicae. *BMC Plant Biol.* **11**, 11. [https://doi.org/10.1186/1471-](https://doi.org/10.1186/1471-2229-11-11)  
647 [2229-11-11](https://doi.org/10.1186/1471-2229-11-11) (2011).
- 648 54. Källberg, M. *et al.* Template-based protein structure modeling using the RaptorX  
649 web server. *Nat. Protoc.* **19**, 1511–1522 (2012).

- 650 55. Van Dammes, E. J. *et al.* Novel concepts about the role of lectins in the plant cell.  
651 *Adv. Exp. Med. Biol.* **705**, 271–294 (2011).
- 652 56. Lannoo, N., & Van Damme, E. J. Lectin domains at the frontiers of plant defense.  
653 *Front Plant Sci.* **13**, 5:397. eCollection. <https://doi.org/10.3389/fpls.2014.00397>  
654 (2014).
- 655 57. Eggermont, L., Verstraeten, B. & Van Damme, E. J. M. Genome-Wide Screening  
656 for Lectin Motifs in *Arabidopsis thaliana*. *Plant Genome* **10**  
657 <https://doi.org/10.3835/plantgenome2017.02.0010> (2017).
- 658 58. Jia, F. *et al.* SCF E3 ligase PP2-B11 plays a positive role in response to salt stress in  
659 *Arabidopsis*. *J. Exp. Bot.* **66**, 4683–97 (2015).
- 660 59. Szklarczyk, D. *et al.* STRING v10: protein-protein interaction networks, integrated  
661 over the tree of life. *Nucleic Acids Res.* **43**, 447–452.  
662 <https://doi.org/10.1093/nar/gku1003> (2015).
- 663 60. Wang G, *et al.* A genome-wide functional investigation into the roles of receptor-  
664 like proteins in *Arabidopsis*. *Plant Physiol.* **147**, 503–517 (2008).
- 665 61. Liebrand, T. W. *et al.* Receptor-like kinase SOBIR1/EVR interacts with receptor-  
666 like proteins in plant immunity against fungal infection. *Proc. Natl. Acad. Sci. USA*  
667 **11**, 10010–10015 (2013).
- 668 62. Wan, W. L. *et al.* Comparing *Arabidopsis* receptor kinase and receptor protein-  
669 mediated immune signaling reveals BIK1-dependent differences. *New Phytol.* **221**,  
670 2080–2095 (2019).
- 671 63. Cabot, C. *et al.* A Role for Zinc in Plant Defense Against Pathogens and Herbivores.  
672 *Front. Plant Sci.* **4**, 1171. <https://doi.org/10.3389/fpls.2019.01171> (2019).
- 673 64. Liu, W. X. *et al.* *Arabidopsis* Di19 functions as a transcription factor and modulates  
674 PR1, PR2, and PR5 expression in response to drought stress. *Mol. Plant* **6**, 1487–  
675 1502 (2013).
- 676 65. Borhan, M. H. *et al.* WRR4, a broad-spectrum TIR-NB-LRR gene from *Arabidopsis*  
677 *thaliana* that confers white rust resistance in transgenic oilseed Brassica crops. *Mol.*  
678 *Plant Pathol.* **11**, 283–291 (2010).
- 679 66. Borhan, M. H. *et al.* WRR4 encodes a TIR-NB-LRR protein that confers broad-  
680 spectrum white rust resistance in *Arabidopsis thaliana* to four physiological races of  
681 *Albugo candida*. *Mol. Plant Microbe Interact.* **21**, 757–768 (2008).
- 682 67. Habazettl, J., Schleicher, M., Otlewski, J. & Holak, T. A. Homonuclear three-  
683 dimensional NOE-NOE nuclear magnetic resonance/spectra for structure



- 684           determination of proteins in solution. *J. Mol. Biol.* **5**, 156–169 (1992).
- 685           68. Jayo, A. & Parsons, M. Fascin: a key regulator of cytoskeletal dynamics. *Int J*  
686           *Biochem Cell Biol.* **42**, 1614–1617 (2010).
- 687           69. Opassiri, R. *et al.* A stress-induced rice (*Oryza sativa* L.) beta-glucosidase  
688           represents a new subfamily of glycosyl hydrolase family 5 containing a fascin-like  
689           domain. *Biochem. J.* **1**, 241–249 (2007).
- 690           70. Pegoraro, A. F., Janmey, P. & Weitz, D. A. Mechanical Properties of the  
691           Cytoskeleton and Cells. *Cold Spring Harb. Perspect Biol.* **9**, 11 pii: a022038.  
692           <https://doi.org/10.1101/cshperspect.a022038> (2017).
- 693           71. Kast, D. J. & Dominguez, R. The Cytoskeleton-Autophagy Connection. *Curr. Biol.*  
694           **24**, R318–R326. <https://doi.org/10.1016/j.cub.2017.02.061> (2017).
- 695           72. Monastyrska, I., Rieter, E., Klionsky, D. J. & Reggiori, F. Multiple roles of the  
696           cytoskeleton in autophagy. *Biol. Rev. Camb. Philos. Soc.* **84**, 431–448 (2009).
- 697           73. Li, J. & Staiger, C. J. Understanding Cytoskeletal Dynamics During the Plant  
698           Immune Response. *Annu. Rev. Phytopathol.* **25**, 513–533 (2018).
- 699           74. Li, J., Henty-Ridilla, J. L., Staiger, B. H., Day, B. & Staiger, C. J. Capping protein  
700           integrates multiple MAMP signalling pathways to modulate actin dynamics during  
701           plant innate immunity. *Nat Commun.* **6**, 7206. <https://doi.org/10.1038/ncomms8206>  
702           (2015).
- 703           75. Henty-Ridilla, J. L. *et al.* The plant actin cytoskeleton responds to signals from  
704           microbe-associated molecular patterns. *PLoS Pathog.* **9**, e1003290.  
705           <https://doi.org/10.1371/journal.ppat.1003290> (2013)
- 706           76. Henty-Ridilla, J. L., Li, J., Day, B. & Staiger, C. J. ACTIN DEPOLYMERIZING  
707           FACTOR4 regulates actin dynamics during innate immune signaling in  
708           Arabidopsis. *Plant Cell* **26**, 340–352 (2014).
- 709           77. Jaouannet, M. *et al.* Plant immunity in plant-aphid interactions. *Front. Plant Sci.* **5**,  
710           663. <https://doi.org/10.3389/fpls.2014.00663> (2014).
- 711           78. Rejeb, I. B., Pastor, V. & Mauch-Mani, B. Plant Responses to Simultaneous Biotic  
712           and Abiotic Stress: Molecular Mechanisms. *Plants* **15**, 458–475 (2014).
- 713           79. Thorvaldsdóttir, H., Robinson, J. T. & Mesirov, J. P. Integrative Genomics Viewer  
714           (IGV): high-performance genomics data visualization and exploration. *Brief*  
715           *Bioinform.* **14**, 178–192 (2013).
- 716           80. Anders, S. & Huber, W. Differential expression analysis for sequence count data.  
717           *Genome Biol.* **11**, R106. <https://dx.doi.org/10.1186%2Fgb-2010-11-10-r106> (2010).



- 718 81. Trapnell, C. *et al.* Differential gene and transcript expression analysis of RNA-seq  
719 experiments with TopHat and Cufflinks. *Nat. Protoc.* **1**, 562–578.
- 720 82. Flury, P., Klauser, D., Schulze, B., Boller, T. & Bartels, S. The anticipation of  
721 danger: microbe-associated molecular pattern perception enhances AtPep-triggered  
722 oxidative burst. *Plant Physiol.* **161**, 2023–2035 (2013).
- 723 83. Wyrsh, I., Domínguez-Ferrerías, A., Geldner, N. & Boller, T. Tissue-specific  
724 FLAGELLIN-SENSING 2 (FLS2) expression in roots restores immune responses in  
725 Arabidopsis fls2 mutants. *New Phytol.* **206**, 774–784 (2015).
- 726 84. Muller, P. Y., Janovjak, H. Miserez, A. R. & Dobbie, Z. Processing of gene  
727 expression data generated by quantitative real-time RT-PCR. *BioTechniques* **32**,  
728 1372–1374 (2002).
- 729 85. Han, S. & Kim, D. AtRTPrimer: database for Arabidopsis genome-wide  
730 homogeneous and specific RT-PCR primer-pairs. *BMC Bioinformatics* **7**, 179.  
731 <https://doi.org/10.1186/1471-2105-7-179> (2006).
- 732 86. Truman, W. *et al.* The CALMODULIN-BINDING PROTEIN60 family includes  
733 both negative and positive regulators of plant immunity. *Plant Physiol.* **163**, 1741–  
734 1751 (2013).
- 735 87. Roine, E. *et al.* Hrp pilus: an hrp-dependent bacterial surface appendage produced  
736 by *Pseudomonas syringae* pv. tomato DC3000. *Proc. Natl. Acad. Sci. USA* **94**,  
737 3459–3464 (1997).
- 738 88. Boch, J. *et al.* Identification of *Pseudomonas syringae* pv. tomato genes induced  
739 during infection of *Arabidopsis thaliana*. *Mol. Microbiol.* **44**, 73–88 (2002).
- 740 89. Yao, J., Withers, J. & He, S. Y. *Pseudomonas syringae* infection assays in  
741 Arabidopsis. *Methods Mol. Biol.* **1011**, 63–81 (2013).
- 742 90. Wildermuth, M. C., Dewdney, J., Wu, G. & Ausubel, F. M. Isochorismate synthase  
743 is required to synthesize salicylic acid for plant defence. *Nature* **414**, 562–565  
744 (2001).
- 745 91. Chinchilla, D., Bauer, Z., Regenass, M., Boller, T. & Felix, G. The Arabidopsis  
746 receptor kinase FLS2 binds flg22 and determines the specificity of flagellin  
747 perception. *Plant Cell* **18**, 465–476 (2006).
- 748 92. Altschul, S. F., Gish, W., Miller, W., Myers, E. W. & Lipman, D. J. Basic local  
749 alignment search tool. *J. Mol. Biol.* **215**, 403–410 (1990).
- 750 93. Larkin, M. A. *et al.* Clustal W and Clustal X version 2.0. *Bioinformatics* **1**, 2947–  
751 2748 (2007).

752 94. Tamura, K., Stecher, G., Peterson, D., Filipski, A. & Kumar, S. MEGA6: Molecular  
753 Evolutionary Genetics Analysis version 6.0. *Mol. Biol. Evol.* **30**, 2725–2729 (2013).

#### 754 **Acknowledgments**

755 The authors would like to sincerely acknowledge Dr Sebastian Merker (University of Basel)  
756 for his skillful technical advices and very helpful discussion. We would like to sincerely  
757 thanks Dr Jonathan Seguin (University of Strasburg, France) for his helpful comments and  
758 advice for data analysis and discussion about the results. The authors wish to thank Dr.  
759 Delphine Chinchilla (University of Basel, Switzerland) for her helpful comments and useful  
760 discussions. We are grateful to Dominik Klauser (University of Basel; Syngenta Foundation  
761 for Sustainable Agriculture, Switzerland) for helping us to set up the experiments. We are  
762 sincerely thankful to Peter Palukaitis (Seoul Women’s University, South Korea) for his  
763 critical review and proofreading of the manuscript. We are thankful to the GDC center at the  
764 University of ETH Zurich for their helpful comments. Special thanks to the researchers at the  
765 Faculty of Sciences and Biotechnology at Shahid Beheshti University (Tehran, Iran) for very  
766 helpful discussion and useful comments.

#### 767 **Author Contributions**

768 T.B., M.S., and C.B. conceived and designed the work. T.B. conceptualized the research  
769 work. M.S. and C.B. performed sequence analysis and data analysis. M.S. performed most of  
770 the data mining and experiments. M.S. wrote the original draft of the manuscript. T.B. and  
771 C.B. revised the manuscript. All authors read and approved the final manuscript.

#### 772 **Disclosure of Potential Conflicts of Interest**

773 No potential conflicts of interest were disclosed.

#### 774 **Funding**

775 This research was supported by Freiwillige Akademische Gesellschaft (FAG) award, Basel,  
776 Switzerland [15\_3\_2015], Niklaus und Bertha Burckhardt-Buergin-Stiftung Foundation,  
777 Basel, Switzerland [22\_3\_2016] and the Shahid Beheshti University research fund, Tehran,  
778 Iran.

#### 779 **ORCID**

780 Mehdi Safaeizadeh <http://orcid.org/0000-0003-4729-1290>

781 Thomas Boller <http://orcid.org/0000-0001-6768-7503>

782 Claude Becker <https://orcid.org/0000-0003-3406-4670>

783

784 **Supplementary Information**

785 **Supplementary File S1.** List of all genes in response to flg22 treatment compared to the BSA  
786 treatment

787 **Supplementary File S2.** List of all genes in response to AtPep1 treatment compared to the  
788 BSA treatment

789 **Supplementary File S3.** List of top up-regulated DEGs in response to flg22 treatment  
790 compared to the BSA treatment

791 **Supplementary File S4.** List of top up-regulated DEGs in response to AtPep1 treatment  
792 compared to the BSA treatment

793 **Supplementary File S5.** List of top down-regulated DEGs in response to flg22 treatment  
794 compared to the BSA treatment

795 **Supplementary File S6.** List of top down-regulated DEGs in response to AtPep1 treatment  
796 compared to the BSA treatment

797 **Supplementary File S7.** List of the genes which their expression exclusively identified in the  
798 RNA-seq transcriptional profiling analysis in response to flg22 treatment and are not present  
799 in Affymetrix ATH1 GeneChip

800 **Supplementary File S8.** List of the up-regulated DEGs with fold change cutoff in response to  
801 flg22 treatment compared to the BSA treatment that are present in both RNA-seq experiment  
802 analysis and ATH1 affymetirx genechip

803 **Supplementary File S9.** List of the up-regulated DEGs with fold change cutoff in response to  
804 flg22 treatment compared to the BSA treatment that are exclusively present in RNA-seq  
805 experiment analysis

806 **Supplementary File S10.** List of 85 selected genes for subsequent study

807 **Supplementary File S11.** List of DEGs exclusively up-regulated in response to flg22  
808 treatment compared to the BSA treatment

809 **Supplementary File S12.** List of DEGs exclusively up-regulated in response to AtPep1  
810 treatment compared to the BSA treatment

811 **Supplementary File S13.** List of DEGs exclusively down-regulated in response to flg22  
812 treatment compared to the BSA treatment

813 **Supplementary File S14.** List of DEGs exclusively down-regulated in response to AtPep1  
814 treatment compared to the BSA treatment

815 **Supplementary File S15.** List of up-regulated DEGs in response to flg22 treatment compared  
816 to the AtPep1 treatment

817 **Supplementary File S16.** List of down-regulated DEGs in response to flg22 treatment  
818 compared to the AtPep1 treatment

819

820

821

822

823

824

825

826

827

828

829

830

831

832

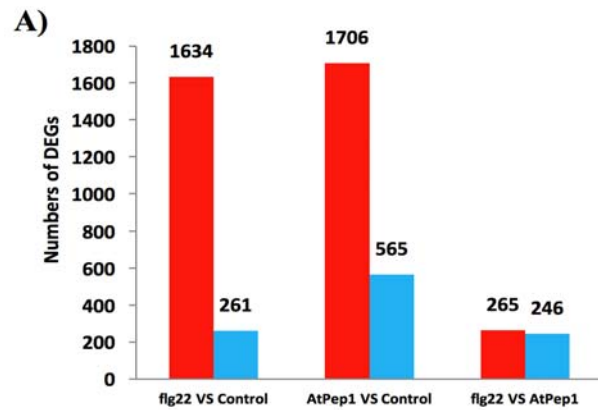

833

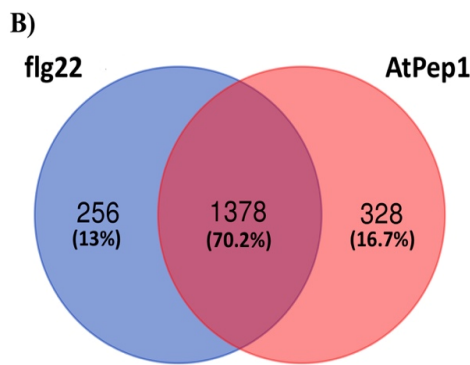

834

835

836

837

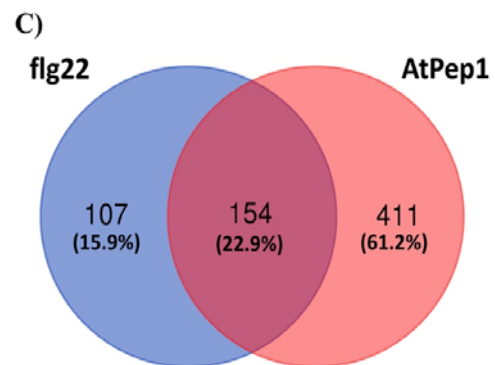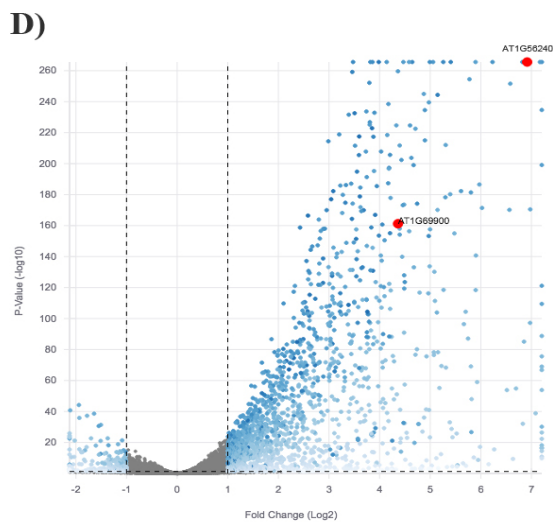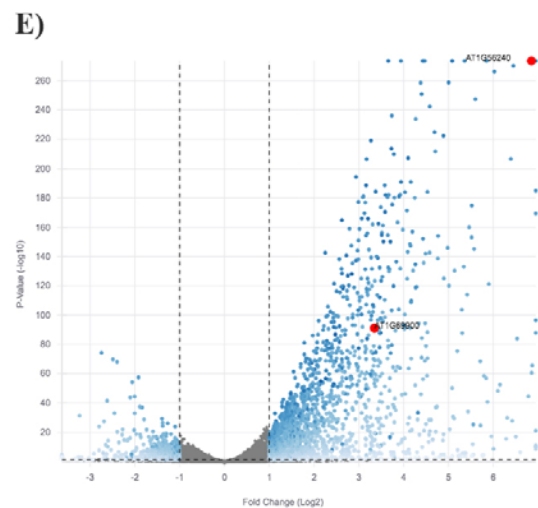

**Table 1.** Detailed information on the top up-regulated genes based on RNA-seq analysis (fold change 30 minutes after flg22 and AtPep1 treatments compared to the control). Genes of interest are highlighted in bold.

---

in response to flg22 and AtPep1 treatments compared to the control investigated in this study. **(B)** Venn diagram of up-regulated DEGs between flg22 treatment and AtPep1 treatments. **(C)** Venn diagram of down-regulated DEGs between flg22 treatment and AtPep1 treatments. **(D)** Volcano plot of DEGs in response to flg22 treatment; **(E)** Volcano plot of DEGs in response to AtPep1 treatment. In **(D-E)**, blue dots correspond to significantly up- and down-regulated DEGs, grey dots represent non-DEGs. *At1G56240 (PP2-B13)* and *At1G69900 (ACLPI)* are highlighted in red.

| Accession Number | flg22 treatment |                  | AtPep1 treatment |                  | Putative function of the gene                                                                                                     | Gene location                                  | Consideration for subsequent study | T-DNA insertion mutant/NASC Code             | Final Genotyping results confirmed by PCR |
|------------------|-----------------|------------------|------------------|------------------|-----------------------------------------------------------------------------------------------------------------------------------|------------------------------------------------|------------------------------------|----------------------------------------------|-------------------------------------------|
|                  | Fold change     | log <sub>2</sub> | Fold change      | log <sub>2</sub> |                                                                                                                                   |                                                |                                    |                                              |                                           |
| AT5G11140        | 503             | 8.97518          | 141              | 7.14031          | Encodes an Arabidopsis phospholipase-like protein (PEARL1 4) family                                                               | Chr5:3545211-3546169                           | Not considered                     | Not available                                | ---                                       |
| AT1G56240        | 126             | 6.97733          | 120              | 6.91095          | Encodes a phloem protein 2-B13 ("PP2-B13"); function in: carbohydrate binding; F-box domain, cyclin-like, F-box domain, Skp2-like | Chr1:21056099-21057577                         | "Consider"                         | detected/<br>SALK_144757_54.5<br>0           | Homozygous line                           |
| AT2G32200        | 95              | 6.57146          | 36               | 5.16218          | Encodes an unknown protein                                                                                                        | Chr2:13676389-13677306                         | Not considered                     | ---                                          | ---                                       |
| AT1G05675        | 72              | 6.17964          | 63               | 5.97188          | Encodes an UDP-Glycosyltransferase superfamily protein                                                                            | Chr1:1701116-1702749                           | Not considered                     | ---                                          | ---                                       |
| AT1G65385        | 65              | 6.01185          | 39               | 5.2804           | Encodes an pseudogene, putative serpin                                                                                            | Chr1:24289566-24291055                         | "Consider"                         | detected/<br>N570388,<br>SALK_070388         | Homozygous line                           |
| AT4G18195        | 60              | 5.9082           | 46               | 5.50896          | Encodes the protein which is the member of a family of proteins related to PUP1, a purine transporter                             | Chr4:10069458-10071115                         | Not considered                     | ---                                          | ---                                       |
| AT5G36925        | 53              | 5.72585          | 55               | 5.78087          | Encodes a protein with unknown protein                                                                                            | Chr5:14565476-14566439                         | Not considered                     | ---                                          | ---                                       |
| AT1G61470        | 33              | 5.03187          | 21               | 4.38478          | Encodes a polynucleotidyl transferase protein which is, ribonuclease H-like superfamily protein                                   | Chr1:22678092-22679302                         | Not considered                     | ---                                          | ---                                       |
| AT4G23215        | 30              | 4.9223           | 28               | 4.83246          | Encodes a pseudogene of cysteine-rich receptor-like protein kinase family protein pseudogene                                      | Chr4:12152900-12153459                         | "Consider"                         | detected/<br>N605169,<br>SALK_105169         | Homozygous line                           |
| AT5G09876        | 29              | 4.83977          | 11               | 3.4823           | Encodes an unknown protein                                                                                                        | Chr5:3079887-3080435<br>Chr1:22032313-22033297 | Not considered                     | ---                                          | ---                                       |
| AT1G59865        | 28              | 4.79972          | 39               | 5.27729          | Encodes an unknown protein                                                                                                        | Chr1:22032313-22033297                         | "Consider"                         | detected/<br>N584779, SALK_084779            | Not detected                              |
| AT2G35658        | 28              | 4.79818          | 22               | 4.46888          | Encodes an unknown protein                                                                                                        | Chr2:14990325-14990935                         | "Consider"                         | detected/<br>N825604,<br>SAIL_600_D01        | Not detected                              |
| AT1G24145        | 26              | 4.71633          | 11               | 3.52029          | Encodes an unknown protein, located in: endomembrane system                                                                       | Chr1:8540838-8542053                           | "Consider"                         | detected/<br>N835081,<br>SAIL_784_C07        | Homozygous line                           |
| AT3G07195        | 24              | 4.58759          | 19               | 4.28252          | Encodes a RPM1-interacting protein 4 (RIN4) family protein                                                                        | Chr3:2288732-2290515                           | Not considered                     | ---                                          | ---                                       |
| AT1G18300        | 22              | 4.48140          | 9                | 3.15319          | Encodes a nudix hydrolase homolog 4 (NUDT4) protein                                                                               | Chr1:6299669-6301139                           | Not considered                     | ---                                          | ---                                       |
| AT2G24165        | 22              | 4.47869          | 16               | 4.03998          | Encodes a pseudogene, similar to HerVf3 protein                                                                                   | Chr2:10272672-10273595                         | Not considered                     | ---                                          | ---                                       |
| AT1G69900        | 20              | 4.34832          | 10               | 3.3191           | Encodes an actin cross-linking protein; CONTAINS InterPro DOMAIN/s ("ACLP1")                                                      | Chr1:26326216-26327965                         | "Consider"                         | detected/<br>N568692,<br>SALK_068692<br>(AR) | Homozygous line                           |
| AT2G27389        | 20              | 4.288968         | 13               | 3.715253         | Encodes an unknown protein                                                                                                        | Chr2:11720294-11721081                         | "Consider"                         | detected/<br>SALK_142825.23.9<br>5           | Homozygous line                           |
| AT4G39580        | 18              | 4.16251          | 21               | 4.40726          | Encodes a Galactose oxidase/kelch repeat superfamily protein                                                                      | Chr4:18385684-18386811                         | Not considered                     | ---                                          | ---                                       |
| AT1G30755        | 14              | 3.83941          | 13               | 3.74068          | Encodes an unknown protein                                                                                                        | Chr1:10905731-10909760                         | "Consider"                         | Not detected/<br>N666232,<br>SALK_063010C    | Not detected                              |

839

840

841

842

843

844

845

846

847

848

849

850

851

852

853

854

855

856

857

858

859

860

861

862

863

864

865

866

867

868

869

870

871

872

873

874

875

876

877

878

879

880

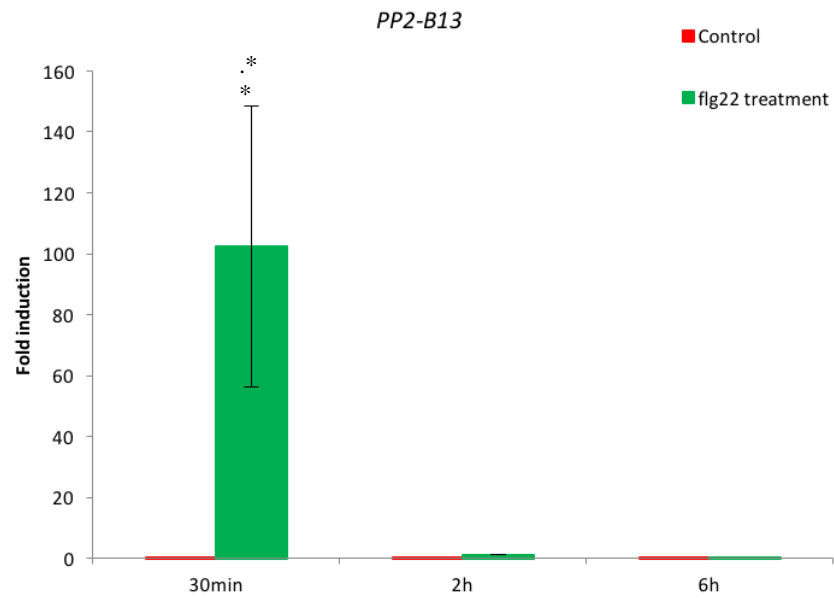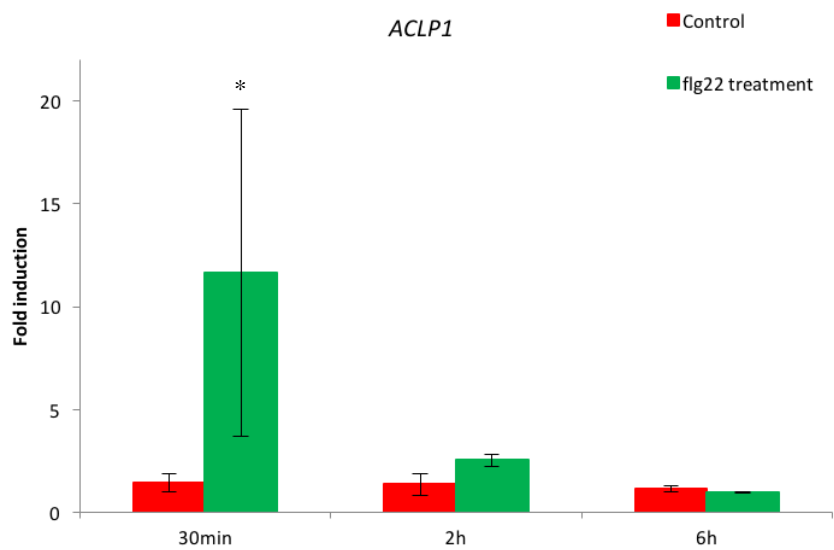



881  
882  
883

**A)**

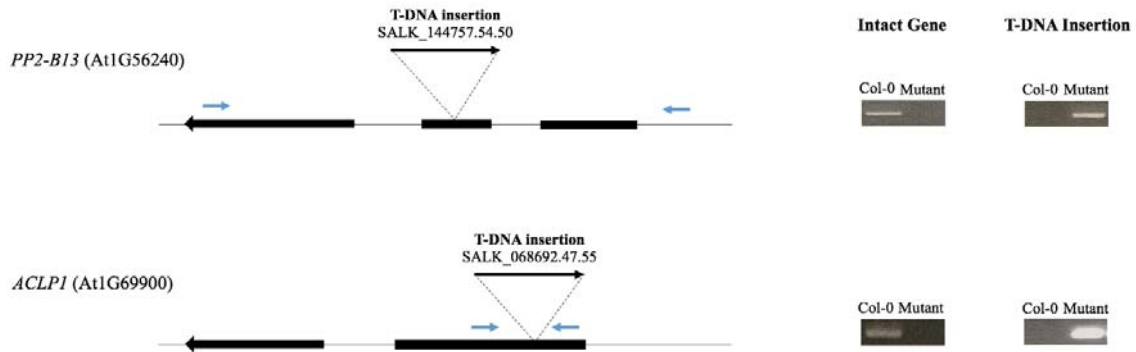

884  
885  
886  
887  
888  
889  
890  
891  
892  
893  
894  
895  
896  
897  
898  
899  
900  
901  
902  
903  
904  
905  
906

**B)**

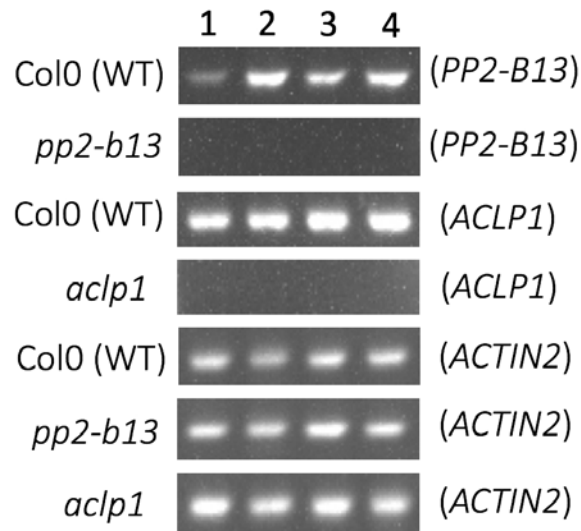

**Figure 3.** A) Schematic representation of homozygous T-DNA mutant lines *PP2-B13*, and *ACLP1*. Boxes indicate exons; thin lines indicate introns; bold arrows indicate T-DNA insertions; arrows indicate the direction of the gene. On the right side, the PCR results of the homozygous lines are shown, amplifying either the intact gene or the T-DNA. Small blue arrows indicate the primers position. **B)** RT-PCR results showing transcripts in Col-0 (WT), *pp2-b13* and *aclp1* mutant lines. The lower panel shows amplification of *ACTIN2* transcript as a control. Numbers 1 to 4 indicate individual plants for each genotype.

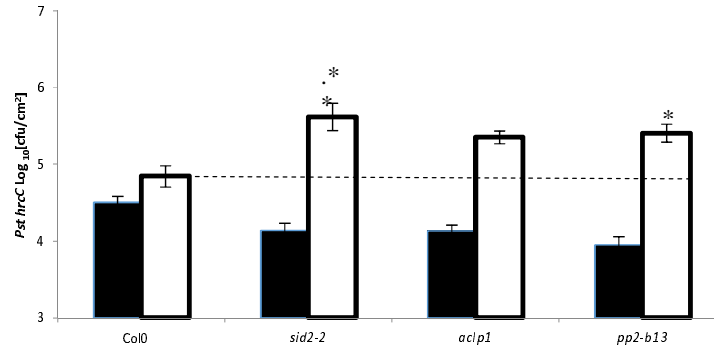

907

**Figure 4.** Bacterial susceptibility assay. Leaves of four- to six-week-old Arabidopsis plants (Col-0, *sid2-2*, *pp2-b13*, and *acp1*) were pressure infiltrated with *Pseudomonas syringae* pv. *tomato* mutant *hrcC*- ( $OD_{600} = 0.0002$ , in infiltration buffer). *sid2-2* mutant plants, which are deficient in salicylic acid production, were used as a positive control. Black bars indicate bacterial colony from leaf discs of infected leaves just after infiltration (0 day); white bars represent colony-forming units ( $cfu/cm^2$ ) 48 h post inoculation. Bars show the mean  $\pm$  s.e. (n=6). Similar results were observed in four independent experiments. Asterisks indicate a significant difference (\* $p \leq 0.05$ , \*\* $p \leq 0.01$ ) from the wild type plants as determined by Student's *t*-test.

913

914

915

916

917

918

919

920

921

922

923

924

925

926

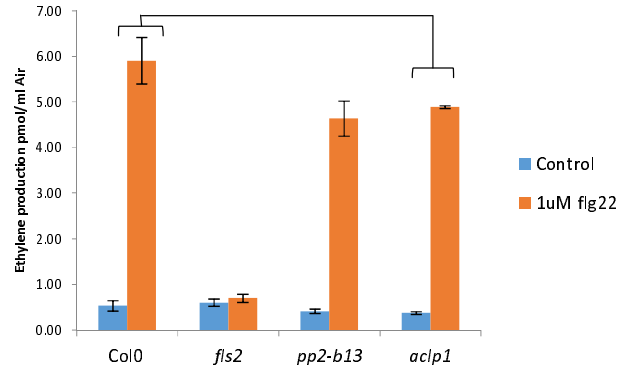

927  
928  
929

**Figure 5.** Early PTI responses upon elicitor treatment. Ethylene accumulation after elicitor treatment. Leaf discs of four- to five-week-old plants of wild-type and mutant lines (*pp2-b13*, and *acp1*) were treated with 1  $\mu$ M of the flg22 elicitor peptide or without any peptide (control). In all cases, ethylene production was measured three and half hours after closing the tubes. Ethylene accumulation in *pp2-b13* and *acp1* mutant lines was compared to the wild type Arabidopsis. *fls2* mutant line was used as a negative control. Columns represent mean ethylene concentration of six biological replicates. Error bars indicate standard deviation with n=6. Similar

930  
931  
932  
933  
934  
935  
936  
937  
938  
939  
940  
941  
942  
943  
944  
945  
946  
947  
948  
949  
950  
951  
952  
953  
954  
955

956  
957  
958  
959  
960  
961  
962  
963  
964  
965  
966  
967  
968  
969  
970  
971  
972  
973  
974  
975  
976  
977  
978  
979  
980  
981  
982  
983  
984  
985

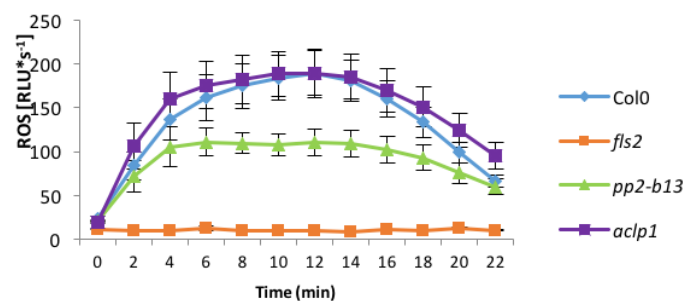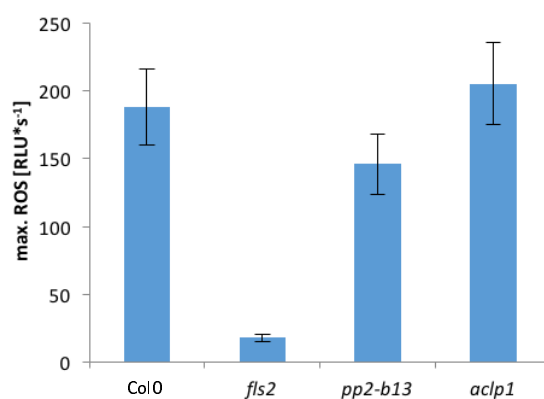

**Figure 6.**

(A) indicates ROS production in *pp2-b13* and *aclp1* mutant lines compared to wild-type Arabidopsis; (B) represents maximum ROS production in *pp2-b13* and *aclp1* mutant lines compared to wild-type Arabidopsis. *fls2* mutant line was used as a negative control.

was repeated four times with similar results. RLU= relative light units.

986

987

988

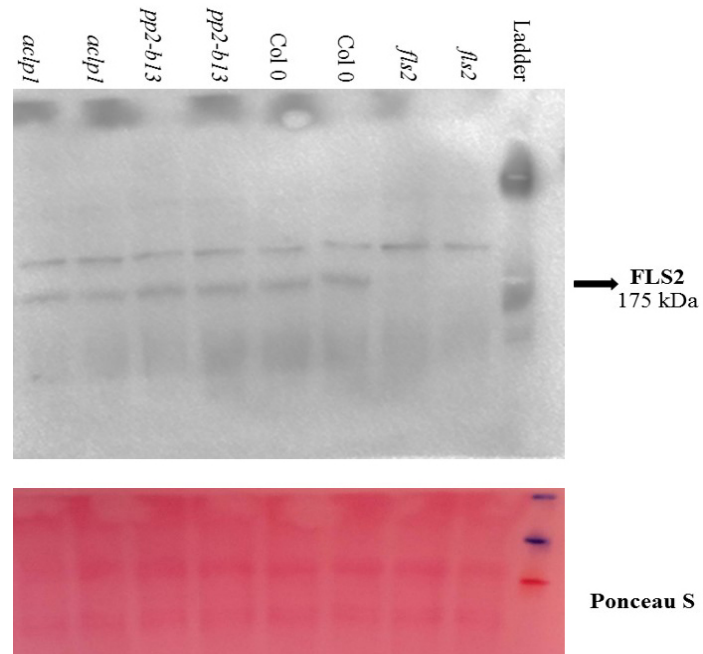

**Figure 7.** FLS2 protein levels. FLS2 protein levels of the mutant lines *pp2-b13* and *aclp1* as detected by immunoblot using a FLS2-specific antibody. *fls2* mutant plant is used as negative control. Ponceau S staining was used as loading control.

989

990

991

992

993

994

995

996

997

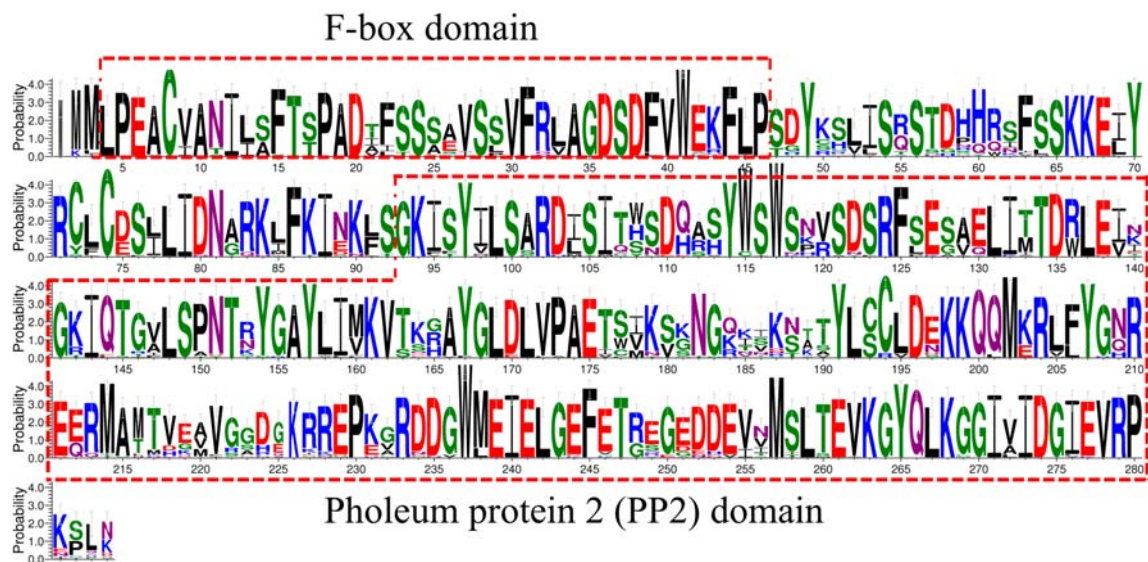

998  
999  
1000

**Figure 8.** Different sequence conservation profiles in the PP2-B13 and its homologues in different plant species. Conservation plots were constructed using WEBLOGO. The y-axis represents the probability score. Y = 4 corresponds to 100% conservation. The predicted domains are highlighted in red boxes.

1001  
1002  
1003  
1004  
1005  
1006  
1007  
1008  
1009  
1010  
1011  
1012  
1013  
1014  
1015  
1016  
1017  
1018  
1019  
1020  
1021  
1022  
1023  
1024  
1025  
1026  
1027

1028  
1029  
1030  
1031  
1032  
1033  
1034  
1035  
1036  
1037  
1038  
1039  
1040  
1041  
1042  
1043  
1044  
1045  
1046  
1047  
1048  
1049  
1050  
1051  
1052  
1053  
1054  
1055  
1056  
1057  
1058  
1059  
1060  
1061  
1062  
1063  
1064  
1065  
1066  
1067  
1068

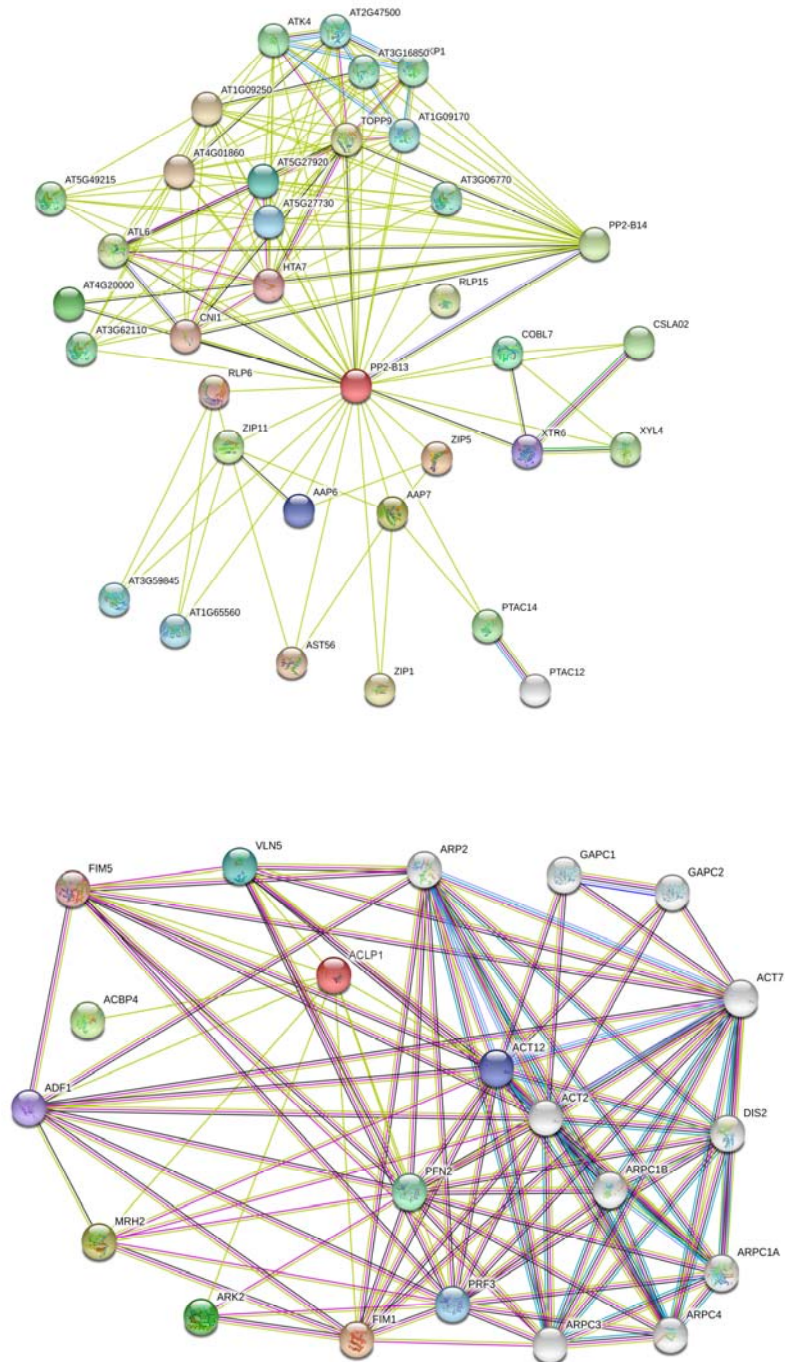

**Figure 9.** The protein-protein interaction (PPI) network of the PP2-B13 and ACLP1 proteins in *Arabidopsis thaliana* based on STRING 11.0. analysis with a confidence threshold score of 0.4 (Szkarczyk et al., 2015).<sup>87</sup> Line colors indicate type of interaction used for the predicted associations: gene fusion (red), gene neighborhood (green), co-occurrence across genomes (blue), co-expression (black), experimental (purple), text mining (light green); association in curated databases (light blue). Line thickness represents the strength of data support. Proteins which have a known function in immune response are marked with dotted lines.

1069



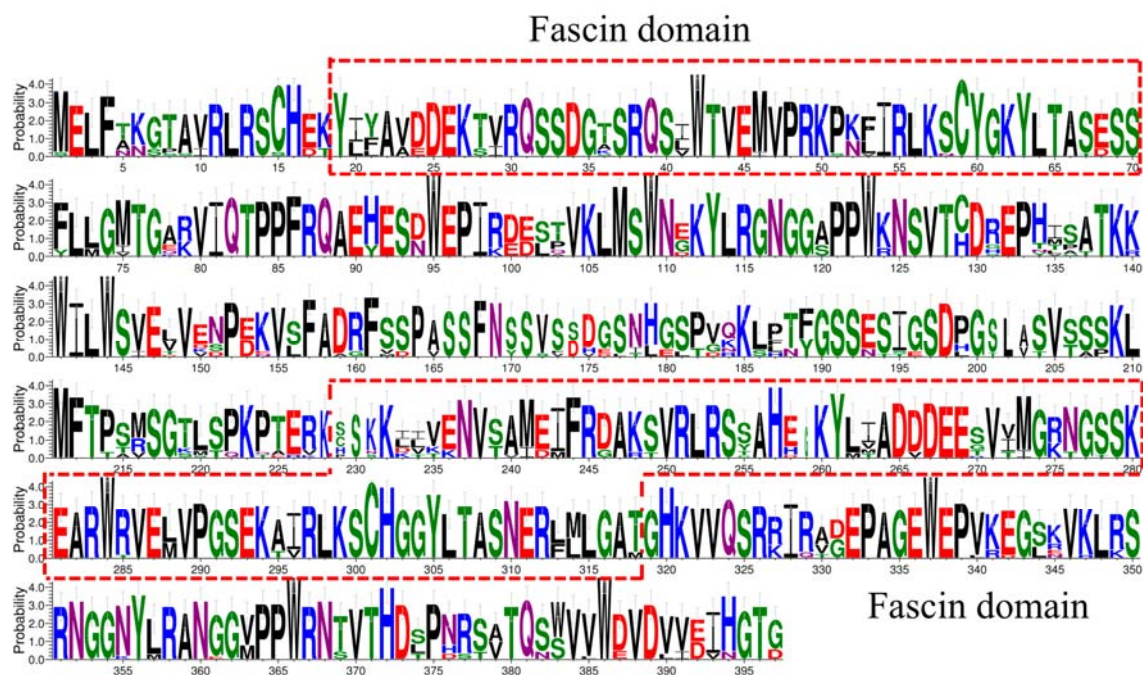

1070  
1071  
1072  
1073

**Figure 10.** Different sequence conservation profiles in the ACLP1 and its homologues in different plant species. Conservation plots were constructed using WEBLOGO. The y-axis represents the probability score.  $Y = 4$  corresponds to 100% conservation. The predicted domains are highlighted in red boxes.

1074  
1075  
1076  
1077  
1078  
1079  
1080  
1081  
1082  
1083  
1084  
1085  
1086  
1087  
1088  
1089  
1090  
1091  
1092  
1093  
1094  
1095  
1096

1097

1098 **Supplementary Information**

1099 **Transcriptomic profiling uncovers novel players in innate immunity in *Arabidopsis***

1100 *thaliana*

1101

1102

**Supplementary Table S1.** Summary of Illumina sequencing data and mapped reads of *Arabidopsis thaliana* wild-type (Col-0) under BSA, flg22 and AtPep1 treatments.

|                                             | treatment |          |          |          |          |          |          |          |          |
|---------------------------------------------|-----------|----------|----------|----------|----------|----------|----------|----------|----------|
|                                             | BSA       |          |          | flg22    |          |          | AtPep1   |          |          |
|                                             | Repeat 1  | Repeat 2 | Repeat 3 | Repeat 1 | Repeat 2 | Repeat 3 | Repeat 1 | Repeat 2 | Repeat 3 |
| <b>Total clean read</b>                     | 1239300   | 12961695 | 14519871 | 17431550 | 9827458  | 14682108 | 12463709 | 10905959 | 12881404 |
| <b>Mapped reads of input</b>                | 11934302  | 12646663 | 14157965 | 16833273 | 9581401  | 14350429 | 12162285 | 10620059 | 12538057 |
| <b>Read mapping rate of input (percent)</b> | 96.3%     | 97.6%    | 97.5%    | 96.6%    | 97.5%    | 97.7%    | 97.6%    | 97.4%    | 97.3%    |
| <b>Unmapped reads</b>                       | 210314    | 227871   | 273224   | 310845   | 170924   | 25657    | 22303    | 189382   | 222259   |
| <b>Unmapped reads (percent)</b>             | 1.8%      | 1.8%     | 1.9%     | 1.8%     | 1.8%     | 1.8%     | 1.8%     | 1.8%     | 1.8%     |

1103

1104

1105

1106

1107

1108

1109

1110

1111

1112

1113

1114

1115

1116

1117

1118

1119

1120

1121

1122

1123  
1124  
1125  
1126  
1127  
1128  
1129  
1130  
1131  
1132  
1133  
1134  
1135  
1136  
1137  
1138  
1139  
1140  
1141  
1142  
1143  
1144  
1145  
1146  
1147  
1148  
1149  
1150  
1151

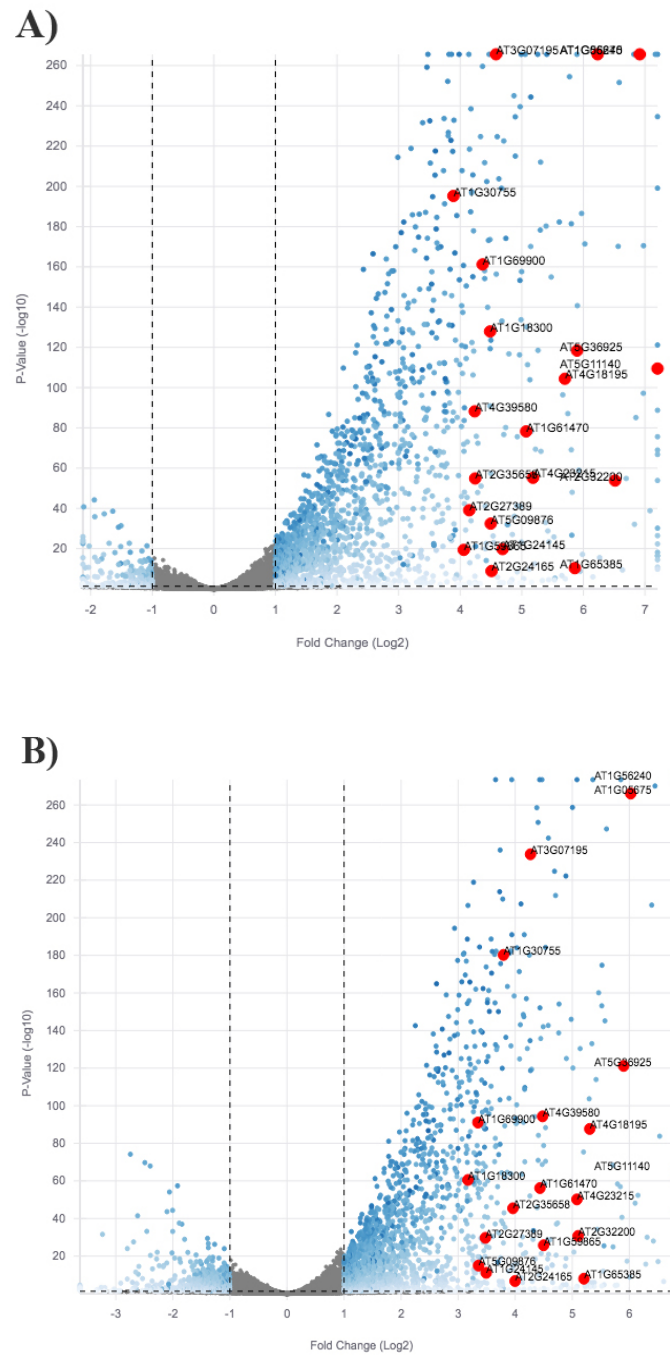

Volcano plot of gene expression in the seedling of Arabidopsis in response to flg22 treatment (**A**) and AtPep1 treatment (**B**). Blue dots correspond to significantly up- and down-regulated DEGs, while non-DEGs are in grey color. R

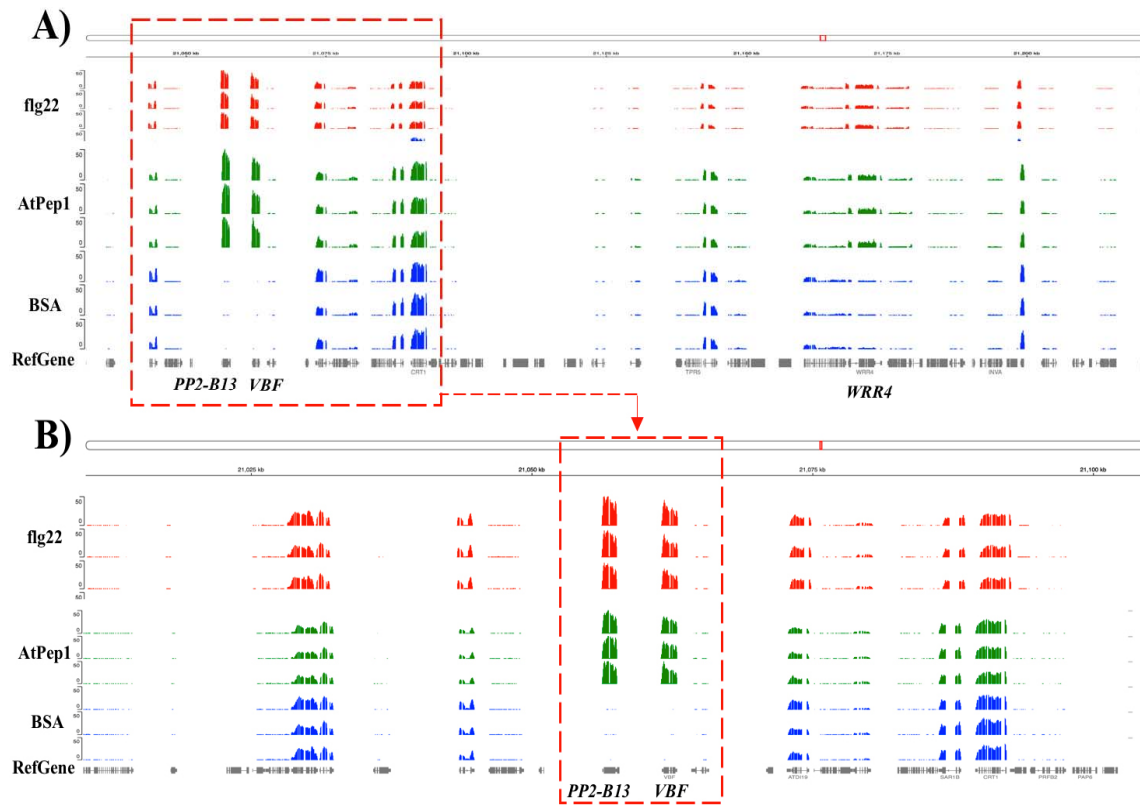

1152  
1153  
1154  
1155  
1156

. Coverage depth graphs represent transcript abundance. (A) Overlaid depth graphs. (B) Zoomed in view of A. In the graph *PP2-B13*, *VBF* and *WRR4* genes are illustrated.

1157  
1158  
1159  
1160  
1161  
1162  
1163  
1164  
1165  
1166  
1167  
1168  
1169  
1170  
1171

1172  
1173

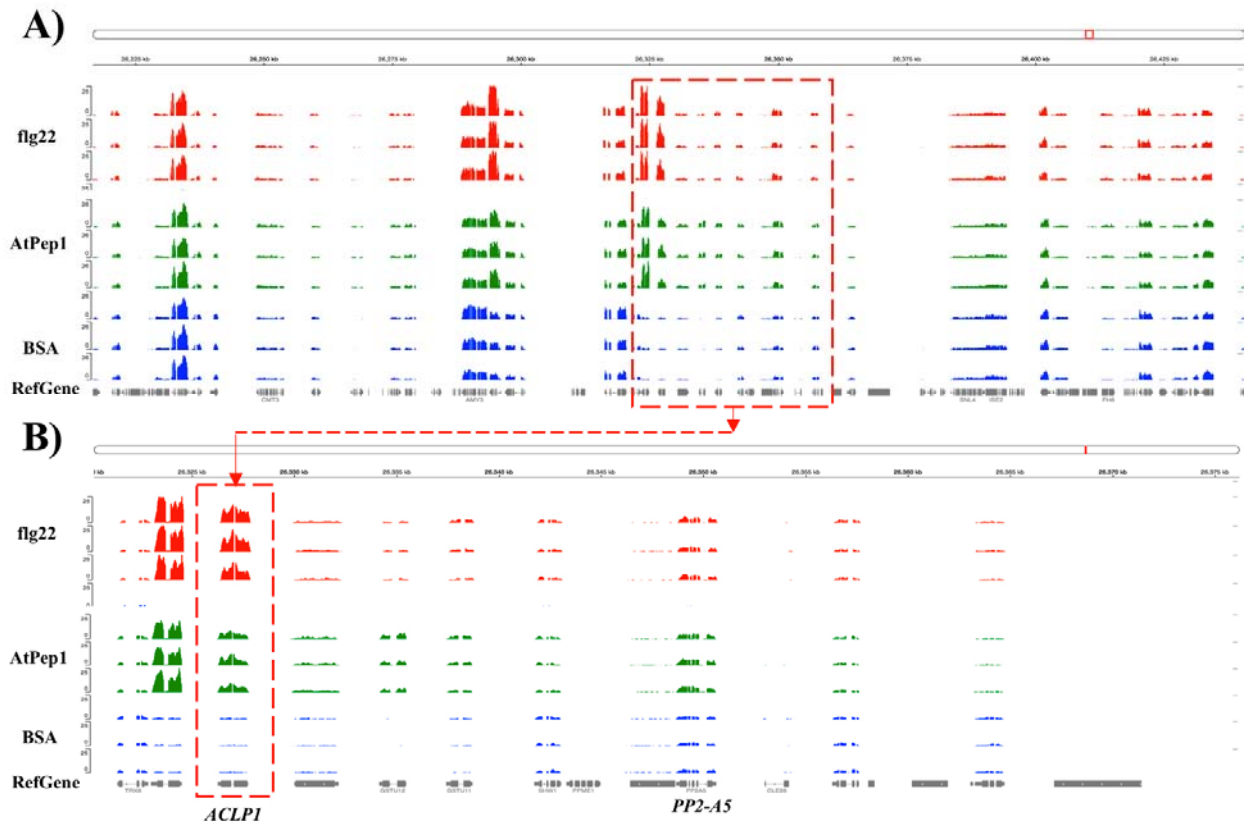

1174  
1175

. (A) Overlaid depth graphs. (B) Zoomed in view of A. In the graph *ACLP1* and *PP2-A5* genes are illustrated.

1176  
1177  
1178  
1179  
1180  
1181  
1182  
1183  
1184  
1185  
1186  
1187  
1188  
1189  
1190  
1191

1192  
1193  
1194  
1195  
1196  
1197  
1198  
1199  
1200  
1201  
1202  
1203  
1204  
1205

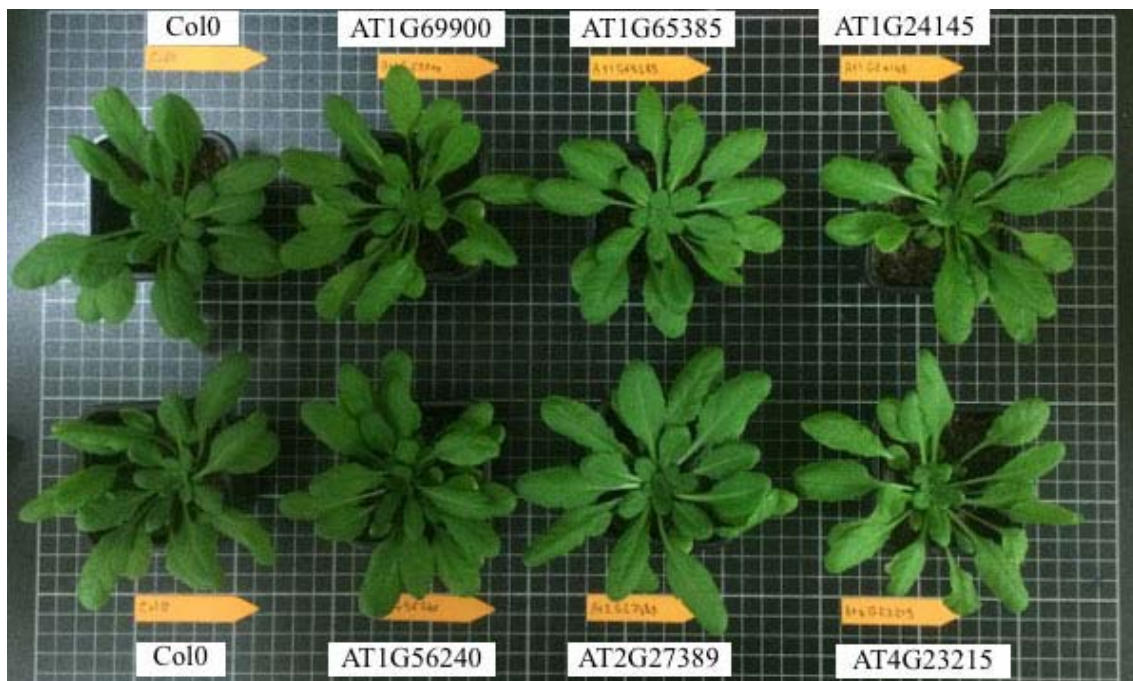

1206  
1207  
1208  
1209  
1210

**Supplementary Figure S4.** Phenotype of five-week old Arabidopsis plants. Plant were grown under short-day conditions (ten hours light at 21°C and 14 hours dark at 18°C, with 60% humidity).

1211  
1212  
1213  
1214  
1215  
1216  
1217  
1218  
1219  
1220



1221  
1222  
1223  
1224  
1225  
1226  
1227  
1228  
1229  
1230  
1231  
1232  
1233  
1234  
1235  
1236  
1237  
1238  
1239  
1240  
1241  
1242  
1243  
1244  
1245  
1246  
1247  
1248  
1249  
1250  
1251  
1252  
1253  
1254  
1255  
1256  
1257  
1258  
1259  
1260  
1261  
1262  
1263  
1264  
1265  
1266  
1267  
1268  
1269  
1270  
1271  
1272  
1273  
1274

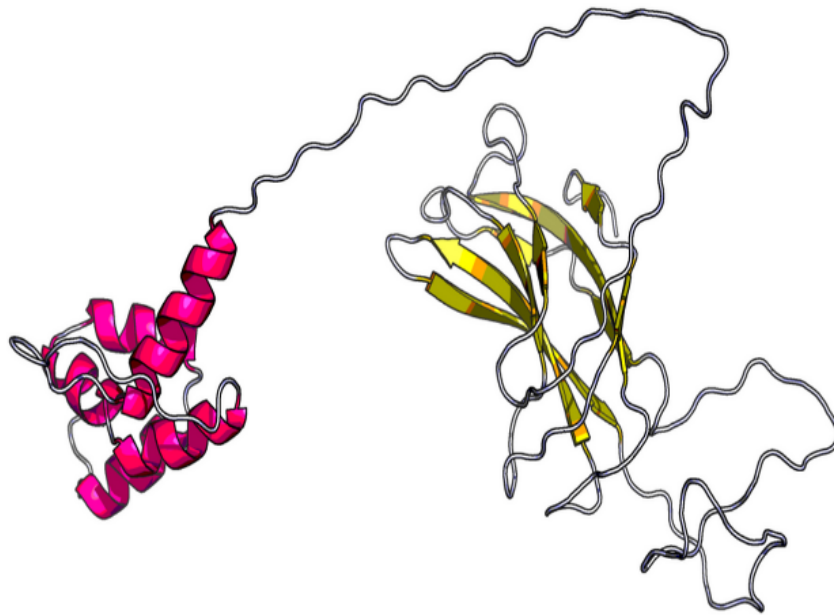

**Supplementary Figure S5.** Structure of PP2-B13 protein determined by Raptor X (Källberg *et al.*, 2012).



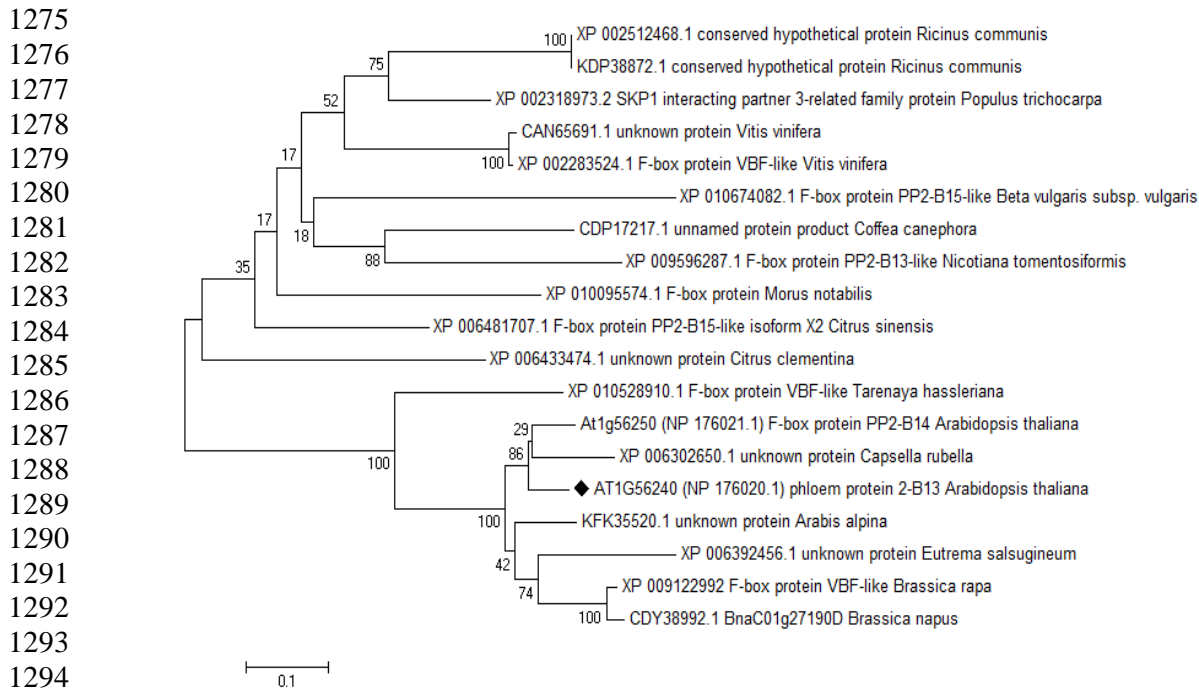

**Supplementary Figure S7.** Phylogenetic analysis from the sequences of PP2-B13 protein in *Arabidopsis thaliana* and 15 representative land plants. The species indicated are *Ricinus communis*, *Populus trichocarpa*, *Vitis vinifera*, *Beta vulgaris*, *Coffea canephora*, *Nicotiana tomentosiformis*, *Morus notabilis*, *Citrus sinensis*, *Citrus clementina*, *Tarenaya hassleriana*, *Arabidopsis thaliana*, *Capsella rubella*, *Arabis alpina*, *Eutrema salsugineum*, *Brassica rapa* and *Brassica napus*. PP2-B13 protein in *Arabidopsis thaliana* was labelled. Sequences for comparisons were obtained from GenBank. The accession numbers and protein names (if available) are given. Analysis was done by maximum likelihood method implemented in MEGA6 (Molecular Evolutionary Genetics Analysis) version 6.0.

1295  
1296  
1297  
1298  
1299  
1300  
1301  
1302

1303  
1304

1305

1306

1307

1308

1309

1310

1311

1312

1313

1314

1315

1316

1317

1318

1319

1320

1321

1322

1323

1324

1325

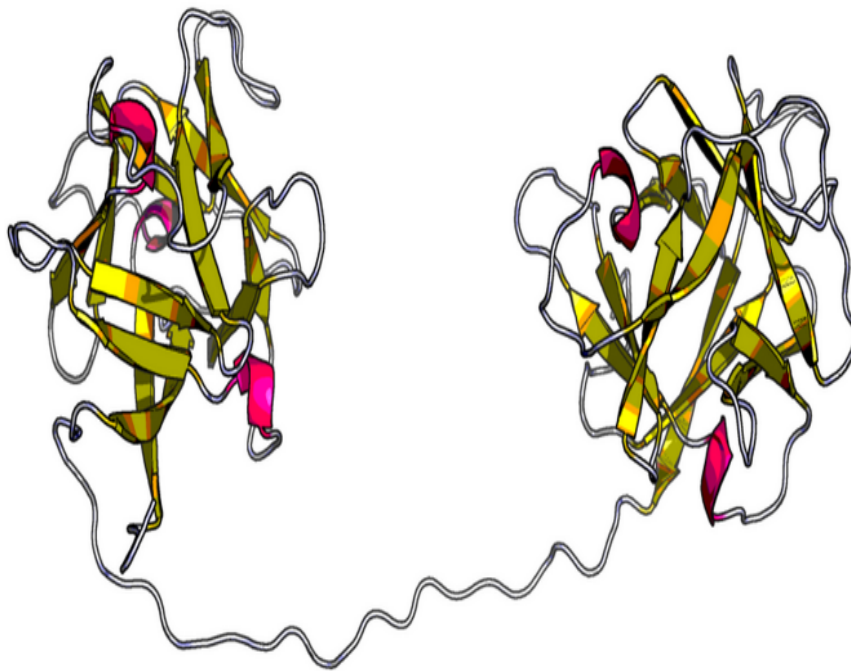

**Supplementary Figure S6.** Structure of ACLP1 protein determined by Raptor X (Källberg *et al.*, 2012).

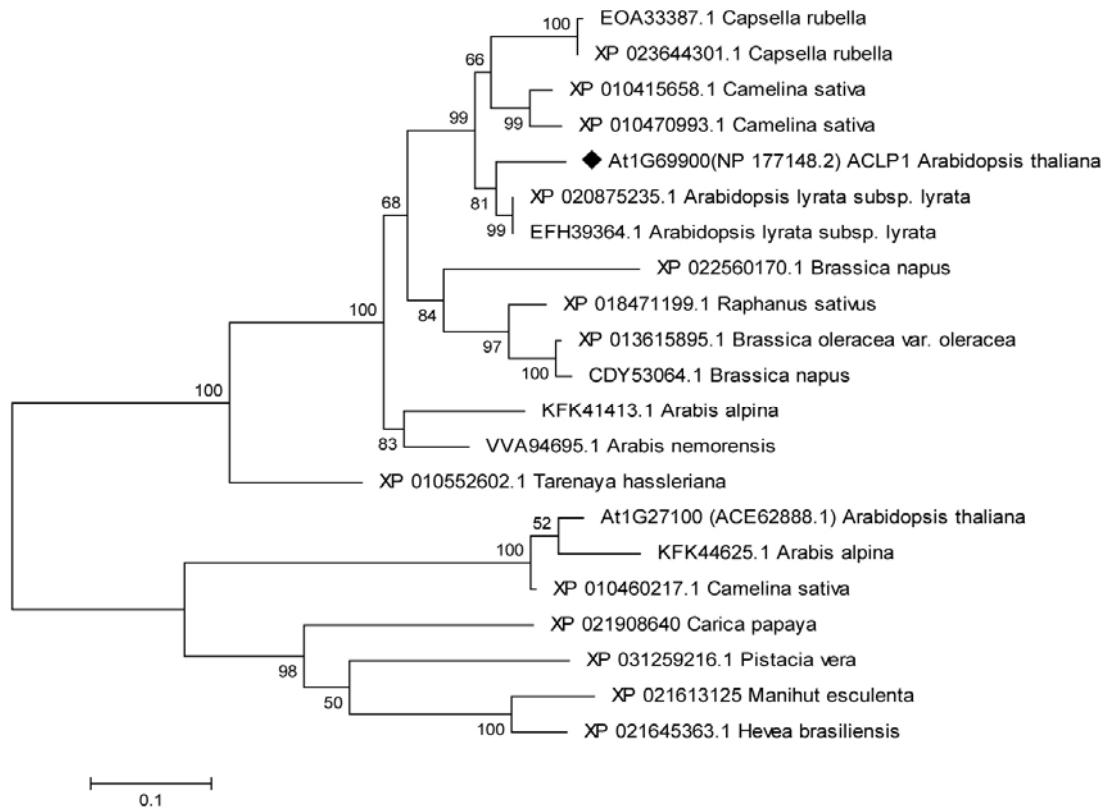

1326

1327

**Supplementary Figure S8.** Phylogenetic analysis from the sequences of ACLP1 protein in *Arabidopsis thaliana* and 14 representative land plants. The species indicated are *Capsella rubella*, *Camelina sativa*, *Arabidopsis thaliana*, *Arabidopsis lyrata*, *Brassica napus*, *Raphanus sativus*, *Brassica oleracea*, *Arabis alpina*, *Arabis nemorensis*, *Tarenaya hassleriana*, *Carica papaya*, *Pistacia vera*, *Manihot esculenta* and *Hevea brasiliensis*. ACLP1 protein in *Arabidopsis thaliana* was labelled. Sequences for comparisons were obtained from GenBank. The accession numbers and protein names (if available) are given. Analysis was done by maximum likelihood method implemented in MEGA6 (Molecular Evolutionary Genetics Analysis) version 6.0.

1328

1329

1330

1331

1332

1333

1334

**Supplementary Table S2.** List of the oligonucleotide primers which were used in this study.

1335

| Name of primer             | Purpose         | DNA sequence (5'-to-3')       | 1336 |
|----------------------------|-----------------|-------------------------------|------|
| SALK_144757.54.50_LP1      | Genotyping      | TCAATCTCCAACCCCGTC            | 1337 |
| SALK_144757.54.50_RP1      | Genotyping      | GGTCAGCAGAAATATGCCAATGATCACT  | 1338 |
| SALK_68692.47.55_LP1       | Genotyping      | GAGACCGACGAGTTAAACTAG         | 1339 |
| SALK_68692.47.55_RP1       | Genotyping      | TAAACCAAAATTCATACGTCTCAAG     | 1340 |
| SALK_LBa1                  | Genotyping      | TGGTTCACGTAGTGGCCATCG         | 1341 |
| SALK_RB                    | Genotyping      | TCATGCGAAACGATCCAG            | 1342 |
| SALK_LB2                   | Genotyping      | CGGTGGACCGCTTGCTGCAACT        | 1343 |
| SAIL-Pdap101_LB1           | Genotyping      | GCCTTTTCAGAAATGGATAAATAGCCTTG | 1344 |
| PP2-B13_RT_fw              | RT-PCR          | CCAGCCGATGCATTTTCGTCATC       | 1345 |
| PP2-B13_RT_rw              | RT-PCR          | TCTTCTCGGTCCCGTAAAATAGC       | 1346 |
| ACLP1_RT_fw                | RT-PCR          | TCGGATCCTGGGTCACCTGTATCAd     | 1347 |
| ACLP1_RT_rw                | RT-PCR          | AGCACTCCGGTTGGTAAATCATGd      | 1348 |
| ACTIN2_RT_fw               | RT-PCR          | AGTGICTGGATCGGTGGTTC          |      |
| ACTIN2_RT_rw               | RT-PCR          | CCCCAGCTTTTAAAGCCTTT          |      |
| PP2-B13 (AT1G56240)_qRT_fw | gene expression | CGTGACACAGACTAAATAATAGATC     |      |
| PP2-B13 (AT1G56240)_qRT_rw | gene expression | CCTCTGAAATAGGGATCAAGATG       |      |
| ACLP1 (AT1G69900)_qRT_fw   | gene expression | GGAATATTTCCATCGCCGATAC        |      |
| ACLP1 (AT1G69900)_qRT_rw   | gene expression | GATCCTGGGTCACCTGTATCAG        |      |
| UBQ10 (AT4G05320)_qRT_fw   | gene expression | GGCCTTGATAATCCCTGATGAATAAG    |      |
| UBQ10 (AT4G05320)_qRT_rw   | gene expression | AAAGAGATAACAGGAACGGAAACATAG   |      |
